# Supplementary material for: In situ ligand and complex transformation of an iron(iii) Schiff base complex: structural evidence and theoretical calculations
Source: Royal Society of Chemistry journal article supplement (doi:10.1039/c2dt30162h), 2012-01-01
Supplement: c2dt30162h.pdf [file c2dt30162h.pdf]

## supplementary information

### *In situ* synthesis of iron(III) complexes with amino acid Schiff base ligand: experimental and theoretical evidences

*Gui-lei Liu, Shu-fang He, Shaowen Zhang, Hui Li\**

Key Laboratory of Cluster Science of Ministry of Education, Department of Chemistry, School of Science, Beijing Institute of Technology, Beijing 100081, P. R. China.  
[lihui@bit.edu.cn](mailto:lihui@bit.edu.cn)

#### Infrared Spectra

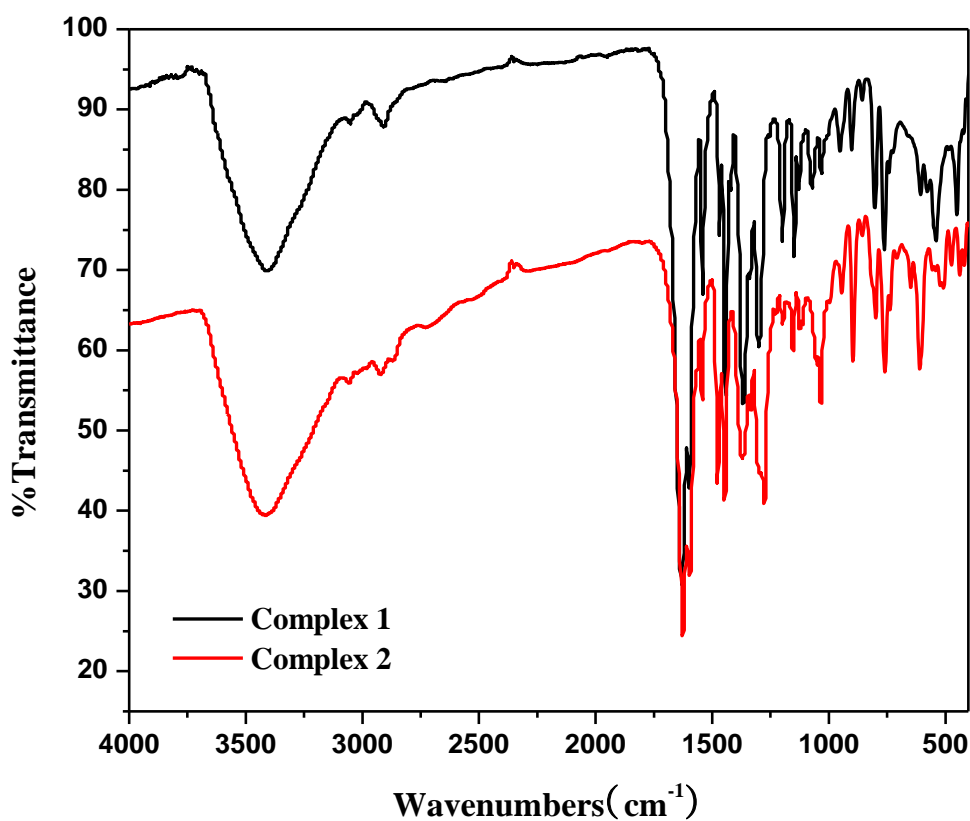

Fig. S1. IR spectrum picture of complexes 1 and 2.

## Crystal Structures

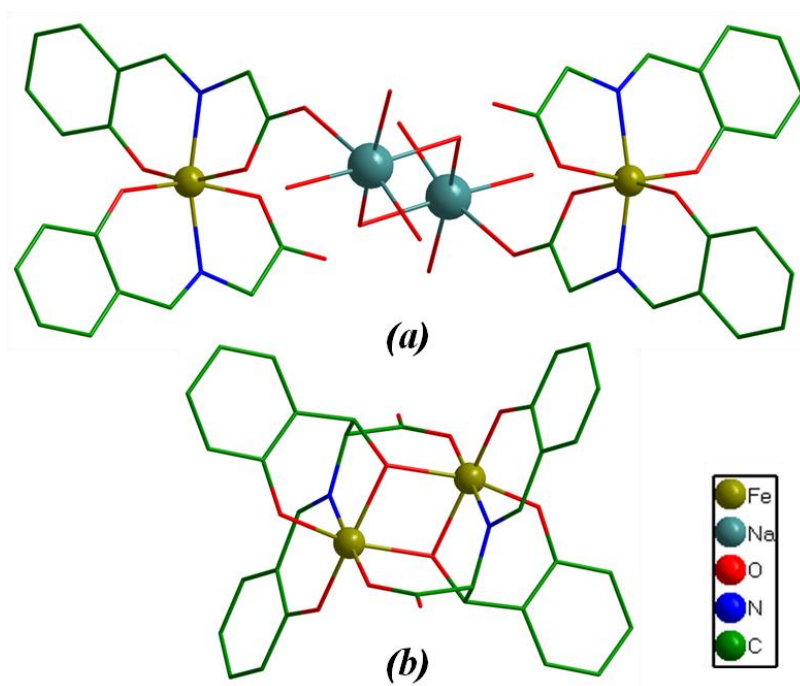

**Fig. S2** The line drawings of the molecular structure of complexes **1** and **2**.

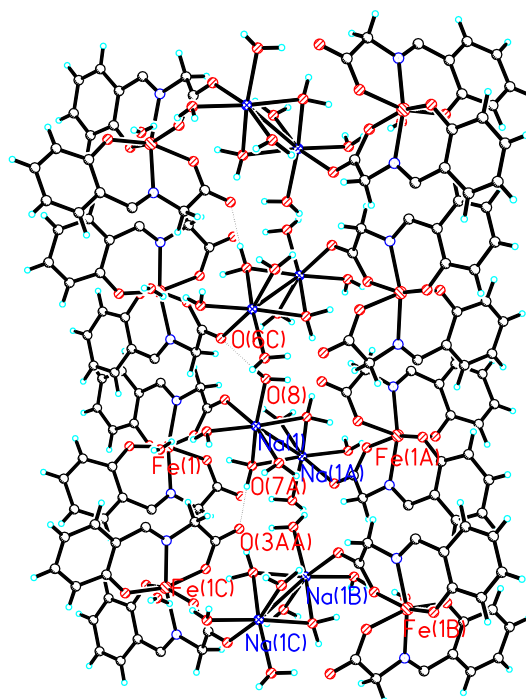

O6C $\cdots$ H08A–O8: 1.985Å, 2.828Å, 162.7°  
O3AA $\cdots$ H70C–O7A: 1.837Å, 2.778Å, 166.8°

**Fig. S3** 1D H-bonding details in complex **1**.

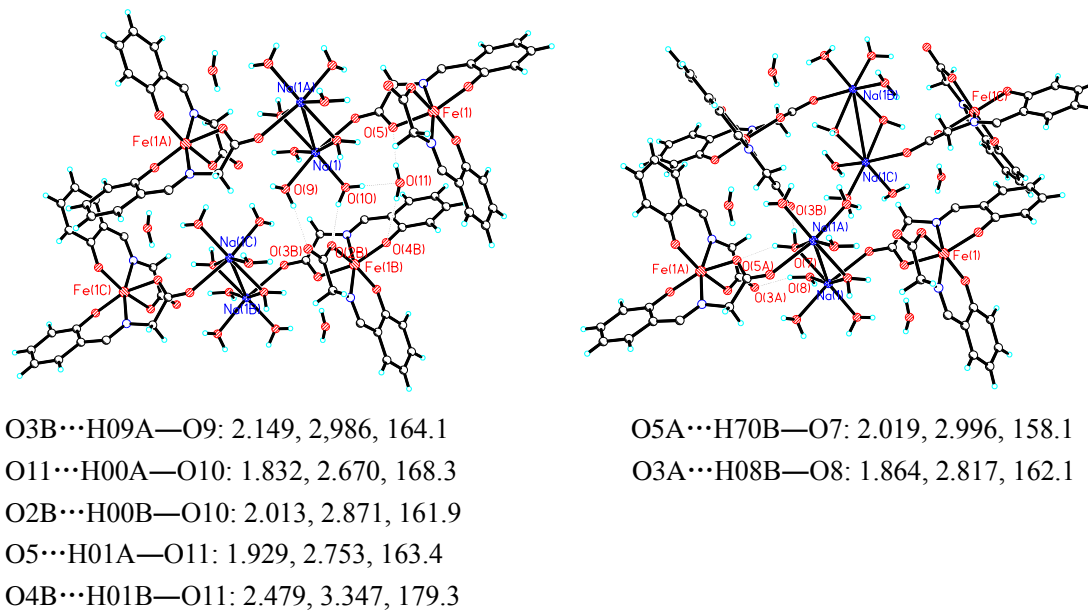

**Fig. S4** 3D H-bonding details in complex **1**.

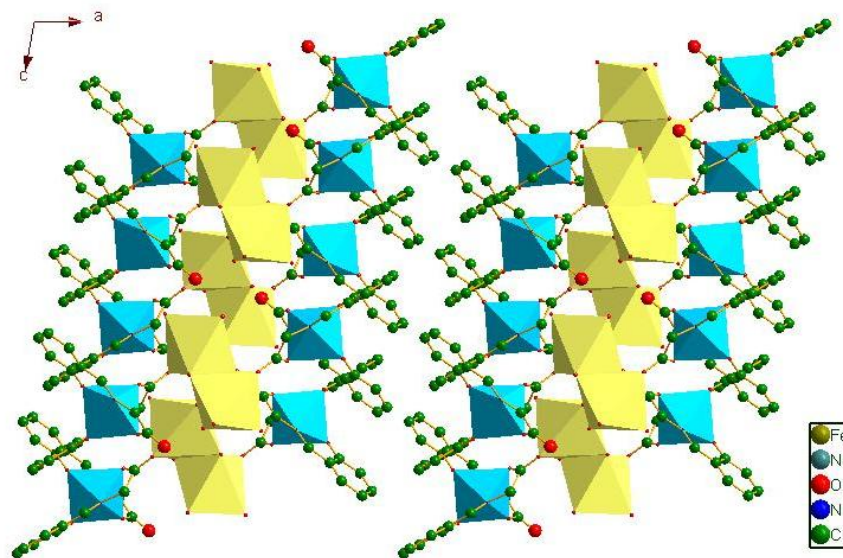

**Fig. S5** The 3D structure picture of complex **1**, view down from b axis.

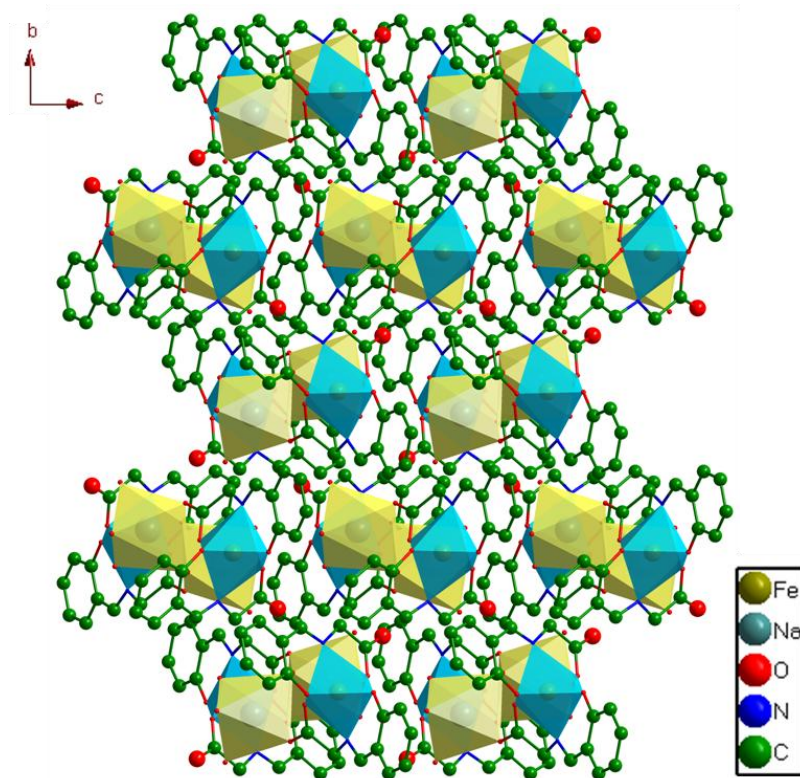

**Fig. S6** The 3D structure picture of complex **1**, view down from a axis.

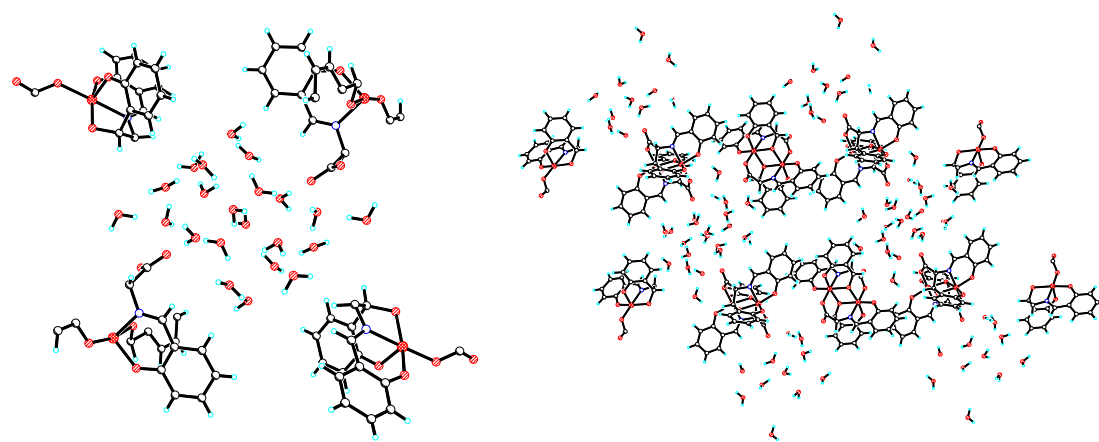

O15...H11F-O11A: 1.976, 2.826, 179.6

O22...H17B-O17A: 1.915, 2.743, 164.1

O3...H5CA-O5A: 1.998, 2.848, 179.5

O12A...H9D-O9: 2.052, 2.901, 176.6

O8...H24C-O24: 1.805, 2.657, 179.0

O12...H23C-O23: 2.279, 3.129, 179.7

**Fig. S7** 3D H-bonding details in complex **2**.

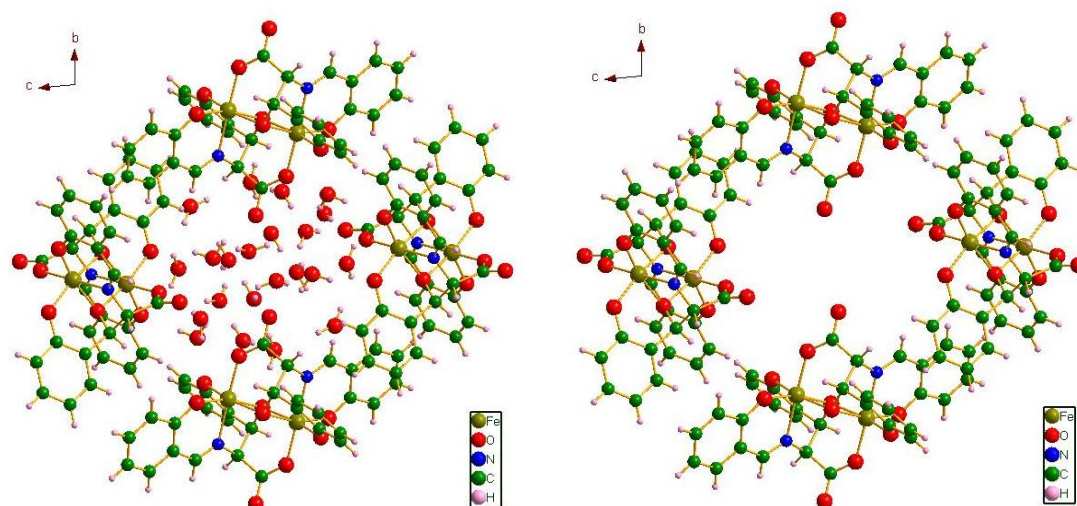

**Fig. S8** The 1D structure picture of complex **2**, view down from a axis. Every four complex can form a hole, and the hole is filled with some water molecules.

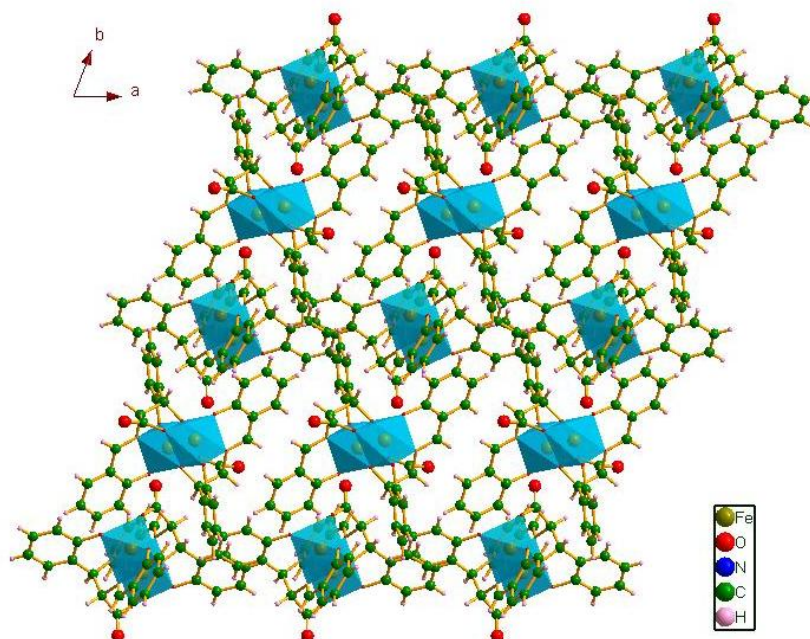

**Fig. S9** The 3D structure picture of complex **2**, view down from b axis.

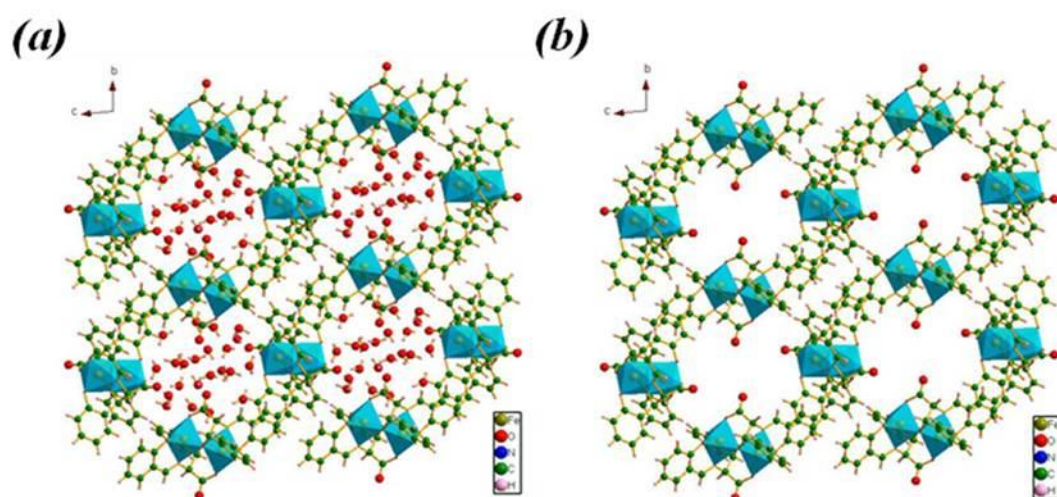

**Fig. S10** The 3D structure picture of complex **2**, view down from a axis.

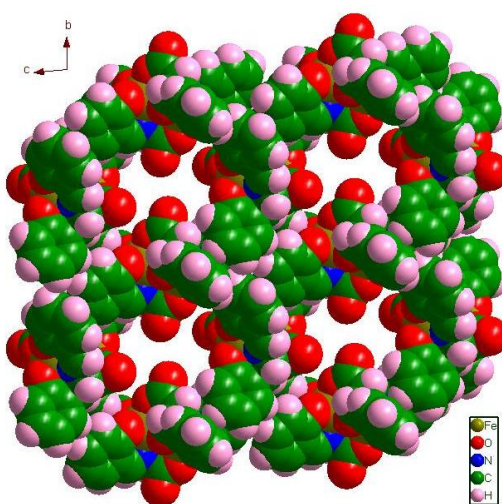

**Fig. S11** The 3D Space-filling picture of complex **2**, view down from a axis.

**Table S1** Selected Bond Distances (Å) and Angles (deg) for **1**

|                           |            |                            |           |
|---------------------------|------------|----------------------------|-----------|
| Fe(1)-O(1)                | 1.930(4)   | Na(1)-O(10)                | 2.346(5)  |
| Fe(1)-O(4)                | 1.933(4)   | Na(1)-O(9)                 | 2.377(4)  |
| Fe(1)-O(2)                | 2.038(4)   | Na(1)-O(8)                 | 2.393(4)  |
| Fe(1)-O(5)                | 2.094(3)   | Na(1)-O(7)                 | 2.434(5)  |
| Fe(1)-N(2)                | 2.092(4)   | Na(1)-O(7) <sup>[a]</sup>  | 2.459(4)  |
| Fe(1)-N(1)                | 2.124(4)   | Na(1)-O(6)                 | 2.534(4)  |
| O(7)-Na(1) <sup>[a]</sup> | 2.459(4)   | Na(1)-Na(1) <sup>[a]</sup> | 3.686(5)  |
| O(1)-Fe(1)-O(4)           | 92.31(18)  | O(2)-Fe(1)-N(1)            | 77.84(16) |
| O(4)-Fe(1)-O(2)           | 89.28(17)  | O(5)-Fe(1)-N(1)            | 88.81(14) |
| O(1)-Fe(1)-O(5)           | 95.01(17)  | O(9)-Na(1)-O(8)            | 95.83(17) |
| O(1)-Fe(1)-N(2)           | 101.48(15) | O(9)-Na(1)-O(7)            | 90.81(17) |
| O(4)-Fe(1)-N(2)           | 86.21(15)  | O(10)-Na(1)-O(6)           | 85.95(16) |
| O(2)-Fe(1)-N(2)           | 94.75(16)  | O(8)-Na(1)-O(6)            | 96.88(14) |
| O(5)-Fe(1)-N(2)           | 76.76(14)  | O(7)-Na(1)-O(6)            | 95.59(16) |

[a] Symmetry code: -x+1,-y+1,-z+1

**Table S2** Geometries (Distances in Å) and Angles in (°) of the Hydrogen Bonds in **1**

| D...H-A                                      | D...H | D...A | D...H-A |
|----------------------------------------------|-------|-------|---------|
| O3 <sup>[d]</sup> ...H70 <sup>[a]</sup> -O7  | 1.837 | 2.778 | 166.8   |
| O5 <sup>[a]</sup> ...H70 <sup>[b]</sup> -O7  | 2.019 | 2.996 | 158.1   |
| O6 <sup>[c]</sup> ...H08 <sup>[a]</sup> -O8  | 1.988 | 2.828 | 162.7   |
| O3 <sup>[a]</sup> ...H08 <sup>[b]</sup> -O8  | 1.864 | 2.817 | 162.1   |
| O3 <sup>[b]</sup> ...H09 <sup>[a]</sup> -O9  | 2.149 | 2.986 | 164.1   |
| O8 <sup>[c]</sup> ...H09 <sup>[b]</sup> -O9  | 2.149 | 2.986 | 164.1   |
| O11...H00 <sup>[a]</sup> -O10                | 1.832 | 2.670 | 168.3   |
| O2 <sup>[b]</sup> ...H00 <sup>[b]</sup> -O10 | 2.013 | 2.871 | 161.9   |
| O5...H01 <sup>[a]</sup> -O11                 | 1.929 | 2.753 | 163.4   |
| O4 <sup>[b]</sup> ...H01 <sup>[b]</sup> -O11 | 2.497 | 3.347 | 179.3   |

[a] Symmetry code: -x+1, -y+1, -z+1; [b] Symmetry code: x, y, z+1; [c] Symmetry code: x, -y+1/2, z+1/2; [d] Symmetry code: -x+1, y-1/2, -z+1/2

**Table S3** Selected Bond Distances (Å) and Angles (°) for **2**

|                            |            |                            |            |
|----------------------------|------------|----------------------------|------------|
| Fe(1)-O(3)                 | 1.927(4)   | Fe(1)#1-O(6)               | 2.005(4)   |
| Fe(1)-O(21)                | 1.947(4)   | Fe(2)-O(1)                 | 1.931(4)   |
| Fe(1)-O(6) <sup>[a]</sup>  | 2.005(4)   | Fe(2)-O(19)                | 2.006(4)   |
| Fe(1)-O(18) <sup>[a]</sup> | 2.016(4)   | Fe(2)-O(2)                 | 2.056(4)   |
| Fe(1)-O(18)                | 2.037(4)   | Fe(2)-O(2) <sup>[b]</sup>  | 2.056(4)   |
| Fe(1)-N(2)                 | 2.113(5)   | Fe(2)-N(1)                 | 2.109(5)   |
| Fe(2)-O(4)                 | 1.937(4)   | O(18)-Fe(1) <sup>[a]</sup> | 2.016(4)   |
| O(3)-Fe(1)-O(18)           | 97.35(16)  | O(4)-Fe(2)-O(2)            | 87.32(16)  |
| O(21)-Fe(1)-O(18)          | 168.16(16) | O(1)-Fe(2)-O(2)            | 164.82(17) |
| O(3)-Fe(1)-N(2)            | 87.70(17)  | O(19)-Fe(2)-O(2)           | 98.87(16)  |
| O(21)-Fe(1)-N(2)           | 88.96(18)  | O(4)-Fe(2)-N(1)            | 90.20(18)  |
| O(18)-Fe(1)-N(2)           | 90.31(16)  | O(1)-Fe(2)-N(1)            | 87.88(18)  |
| O(4)-Fe(2)-O(1)            | 99.89(17)  | O(19)-Fe(2)-N(1)           | 177.47(17) |
| O(4)-Fe(2)-O(19)           | 89.05(17)  | O(2)-Fe(2)-N(1)            | 78.69(16)  |

[a] Symmetry code:  $-x, -y+1, -z+2$  [b] Symmetry code:  $-x, -y, -z+1$

**Table S4** Geometries (Distances in (Å) and Angles in (°)) of Some Important Hydrogen Bonds in **2**

| D...H-A                      | D...H | D...A | D...H-A |
|------------------------------|-------|-------|---------|
| O15...H11F-O11A              | 1.976 | 2.826 | 179.6   |
| O22...H17B-O17A              | 1.915 | 2.743 | 164.1   |
| O3...H5CA-O5A                | 1.998 | 2.848 | 179.5   |
| O12 <sup>[a]</sup> ...H9D-O9 | 2.052 | 2.901 | 176.6   |
| O8...H24C-O24                | 1.805 | 2.657 | 179.0   |
| O12...H23C-O23               | 2.279 | 3.129 | 179.7   |

[a] Symmetry code:  $-x+1, -y+1, -z+1$



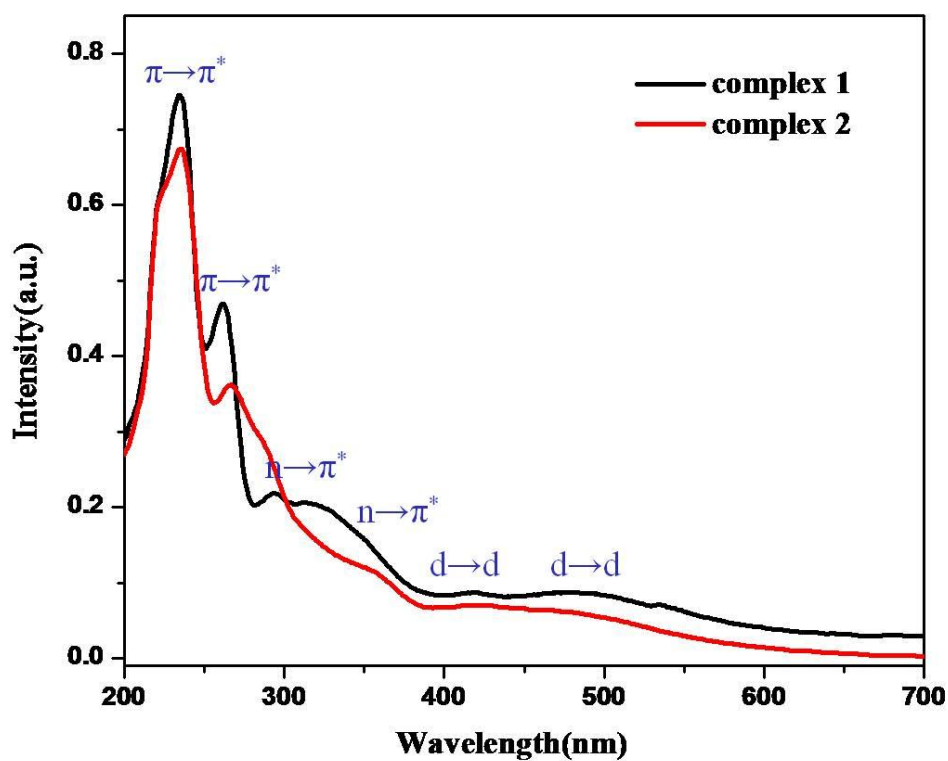

Fig. S12. UV-vis spectra of complexes 1 and 2.

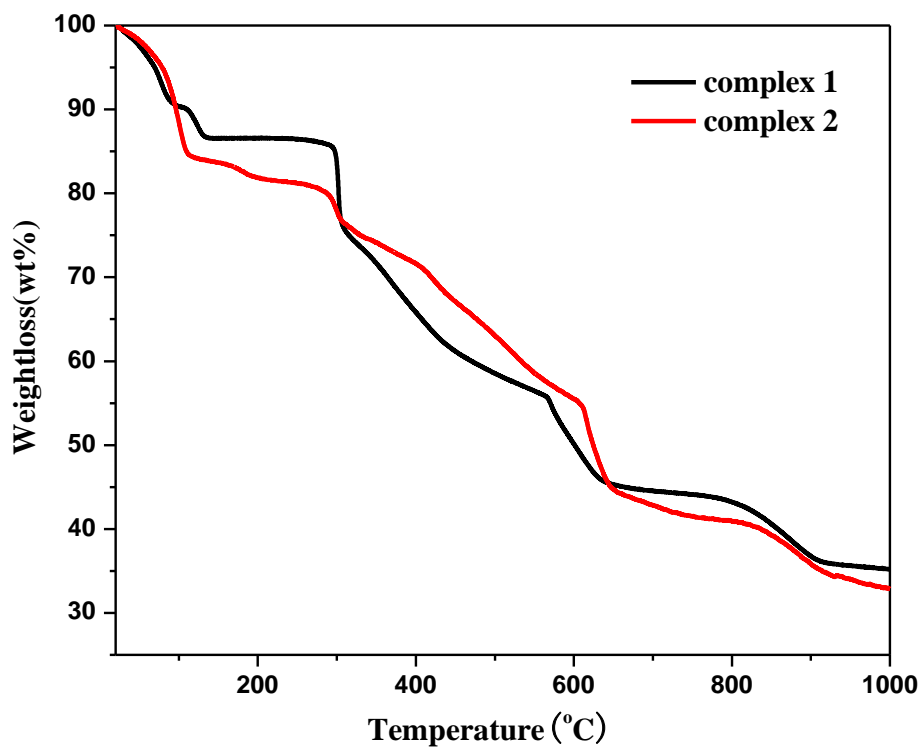

Fig. S13. TG curves for complexes 1 and 2.

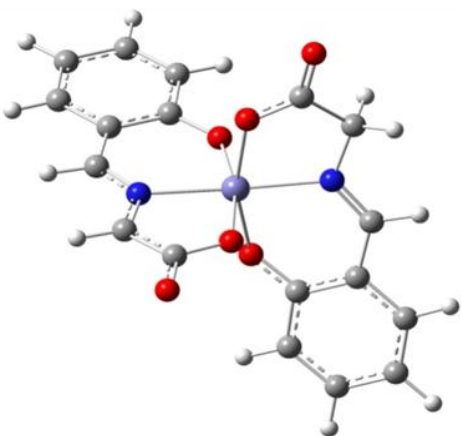

**Int1**

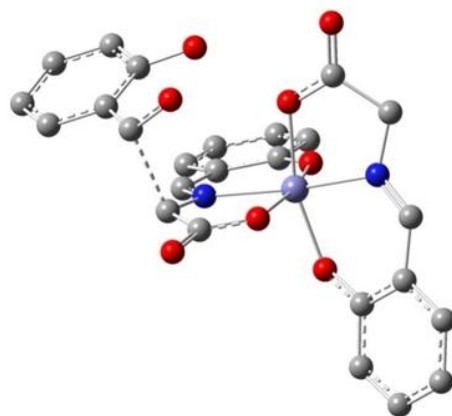

**TS1**

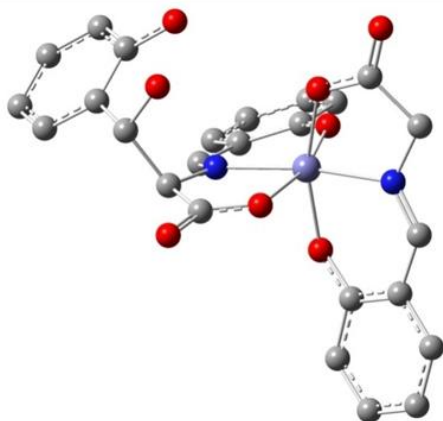

**Int2**

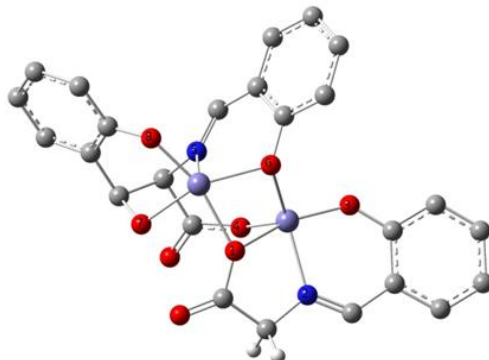

**Int3**

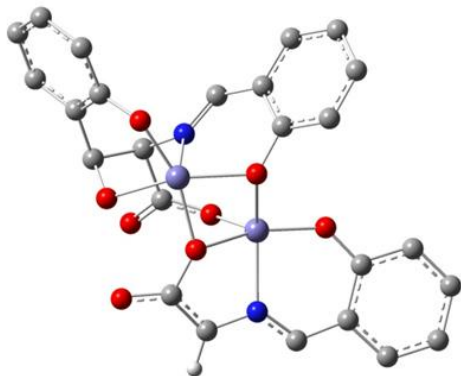

**Int4**

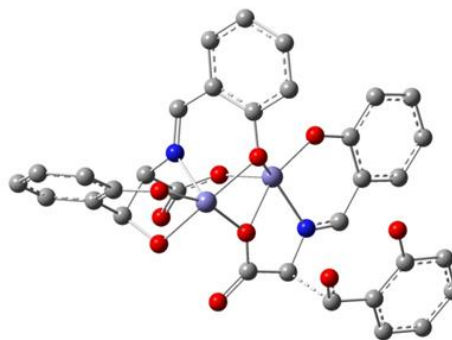

**TS2**

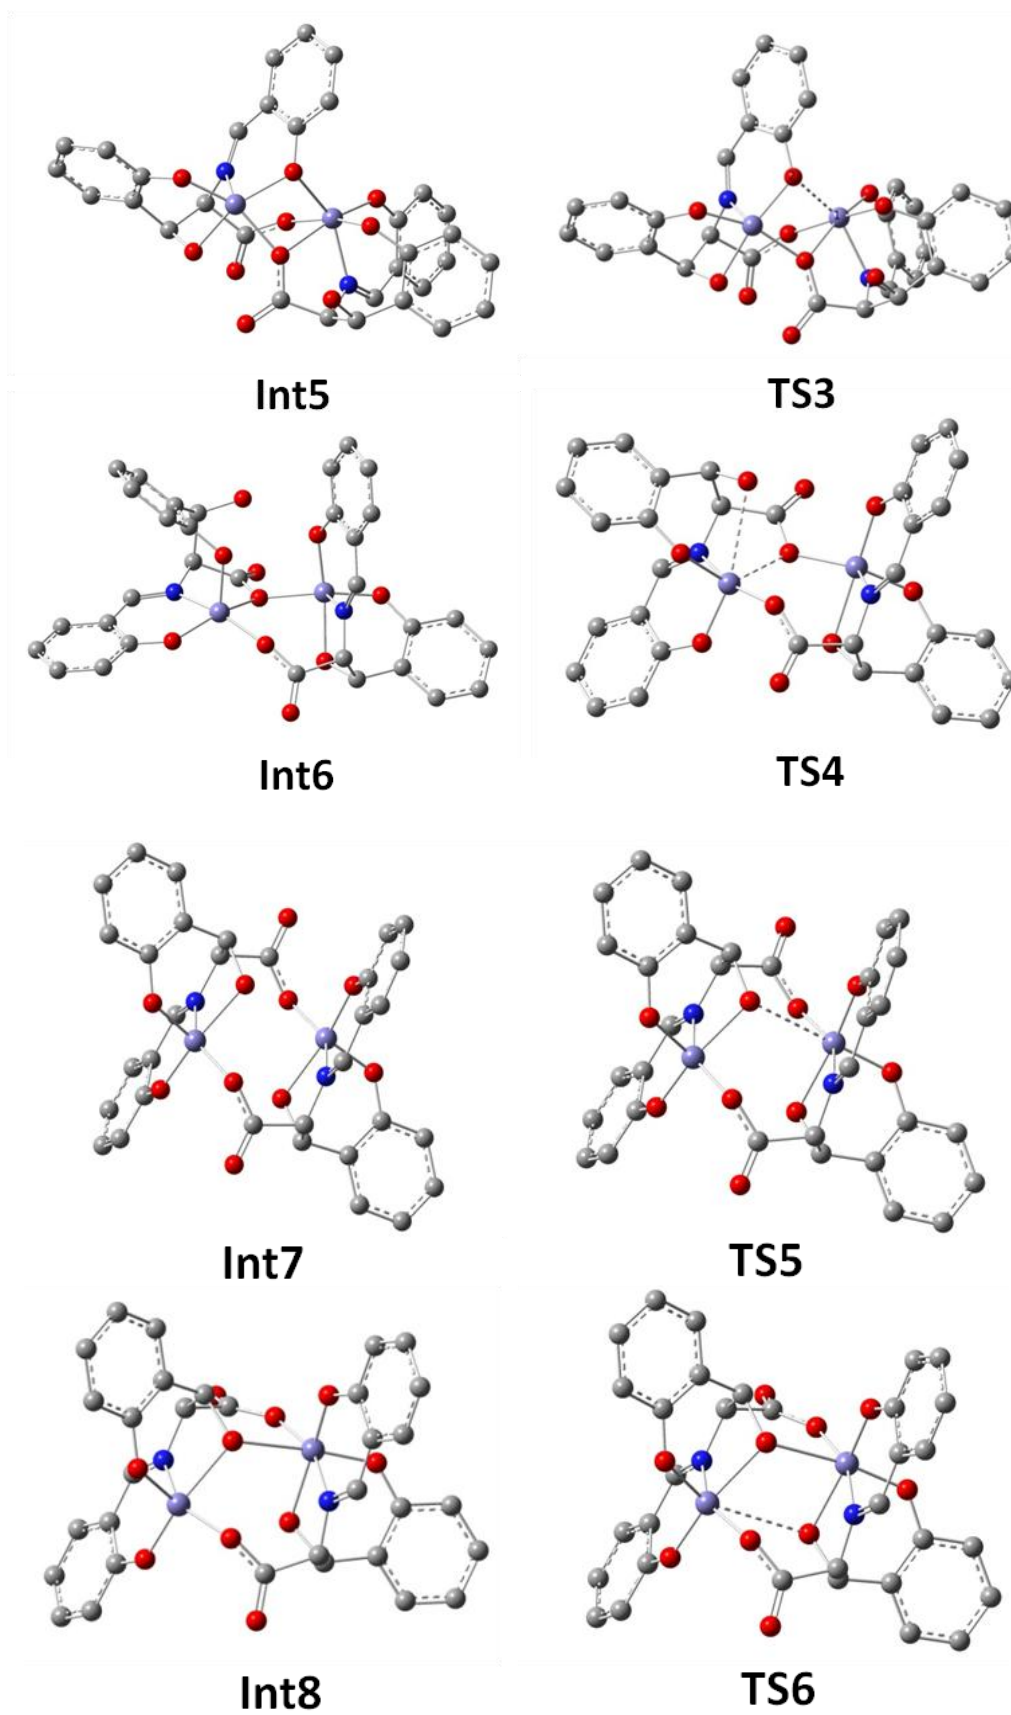

**Fig. S14** The optimized structures of intermediates and transition states involved in the crystal transition process by DFT M06 method.

## Theoretical Calculations

The optimized structures of all the intermediates and transition states involved in the crystal transition process by DFT M06 method. The x-ray structures of Crystal 1 (Com1) and Crystal 2 (Com2) are also shown for comparison.

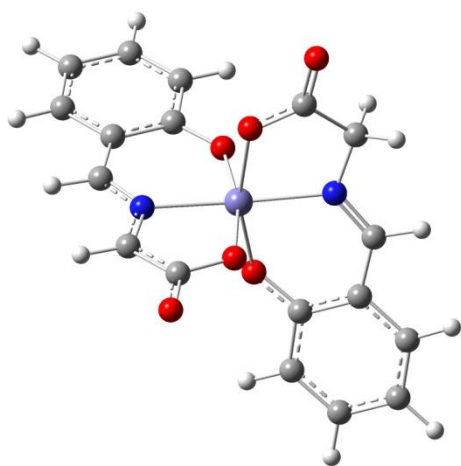

Com1

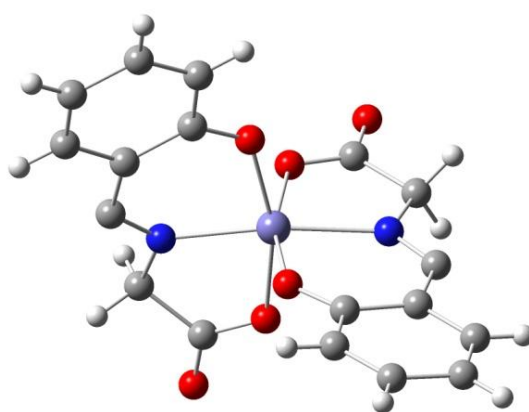

Com1 (x-ray)

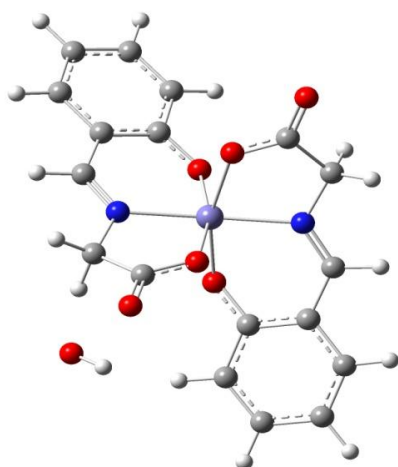

Com1-OH<sup>-</sup> VW

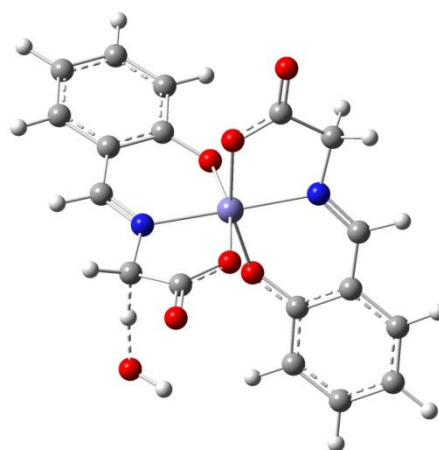

TS1

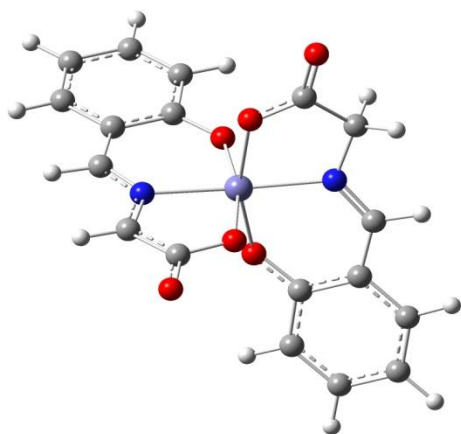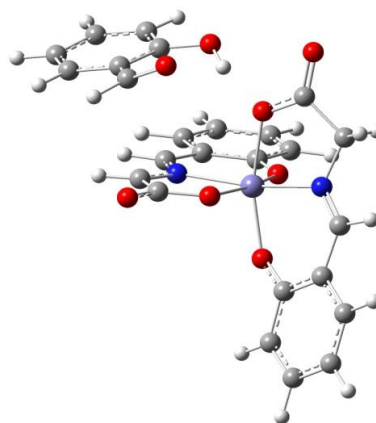

**Int1**

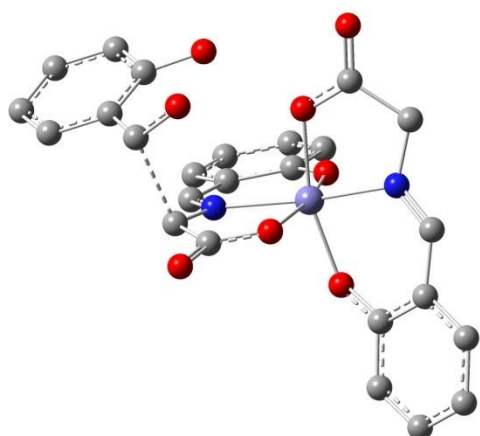

**Int1-Sal VW**

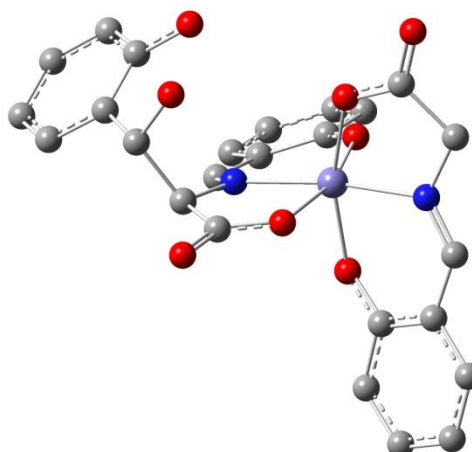

**TS2**

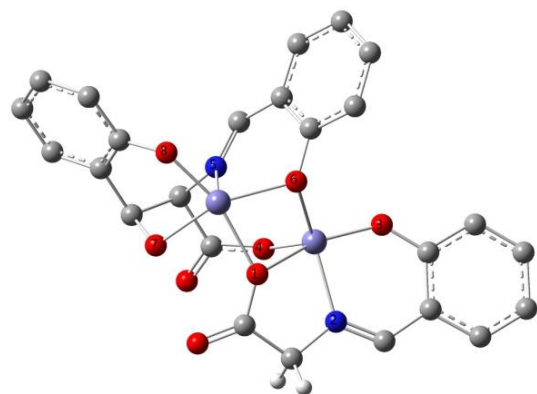

**Int2**

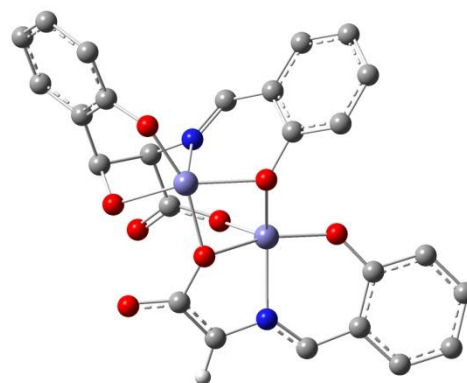

**Int3**

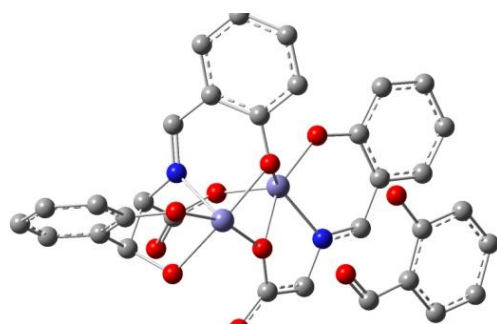

**Int4**

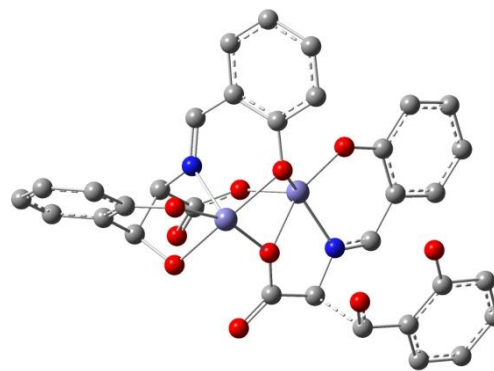

**Int4-Sal VW**

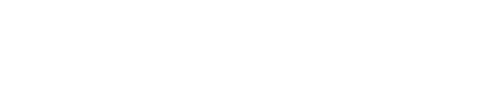

**TS3**

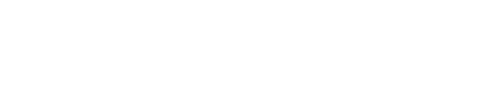

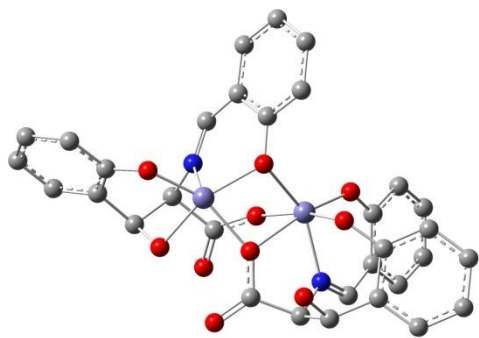

**Int5**

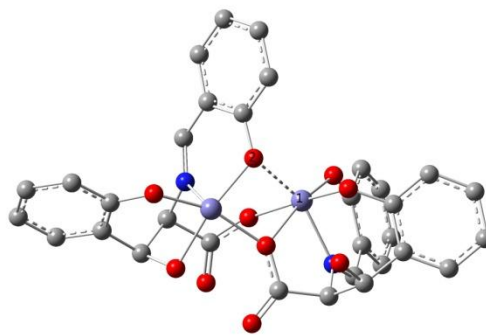

**TS4**

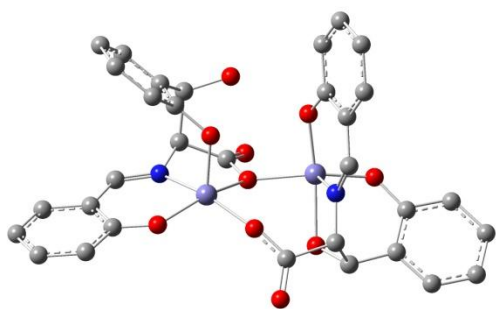

**Int6**

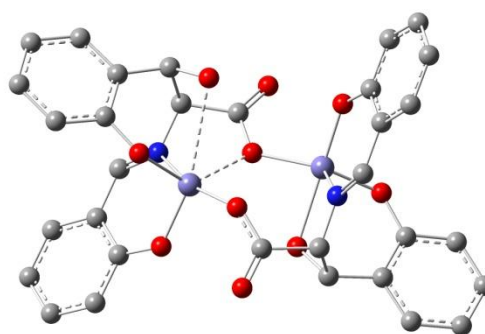

**TS5**

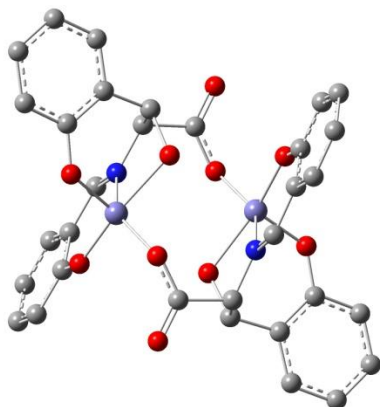

**Int7**

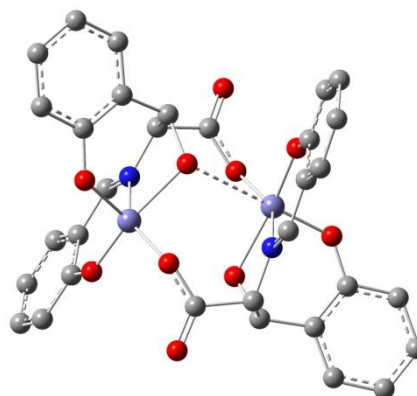

**TS6**

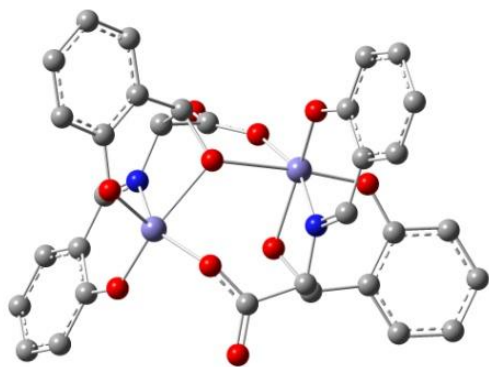

**Int8**

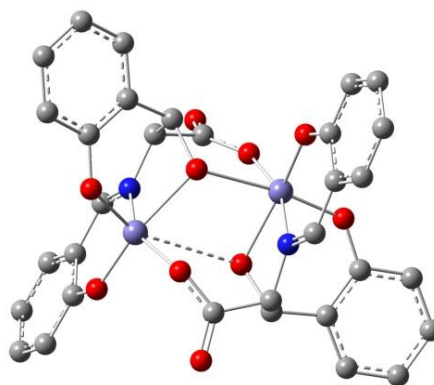

**TS7**

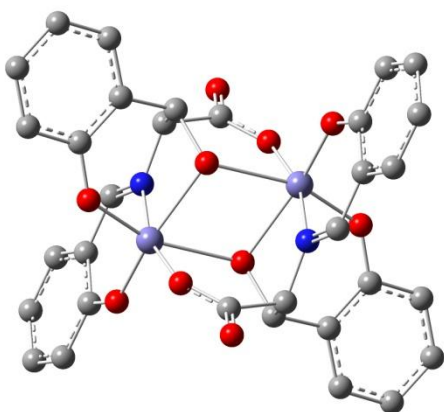

**Com2**

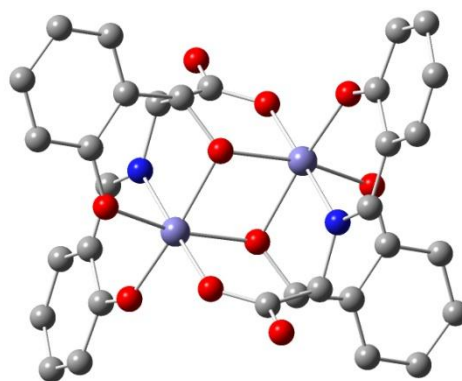

**Com2 (Crystal)**

Gibbs free energy profile of all the intermediates and transition states involved in the crystal transition process calculated by DFT M06 method. The relative electronic energies are shown in parenthesis. The Units for Gibbs free energy and electronic energy is  $\text{kcal}\cdot\text{mol}^{-1}$ .

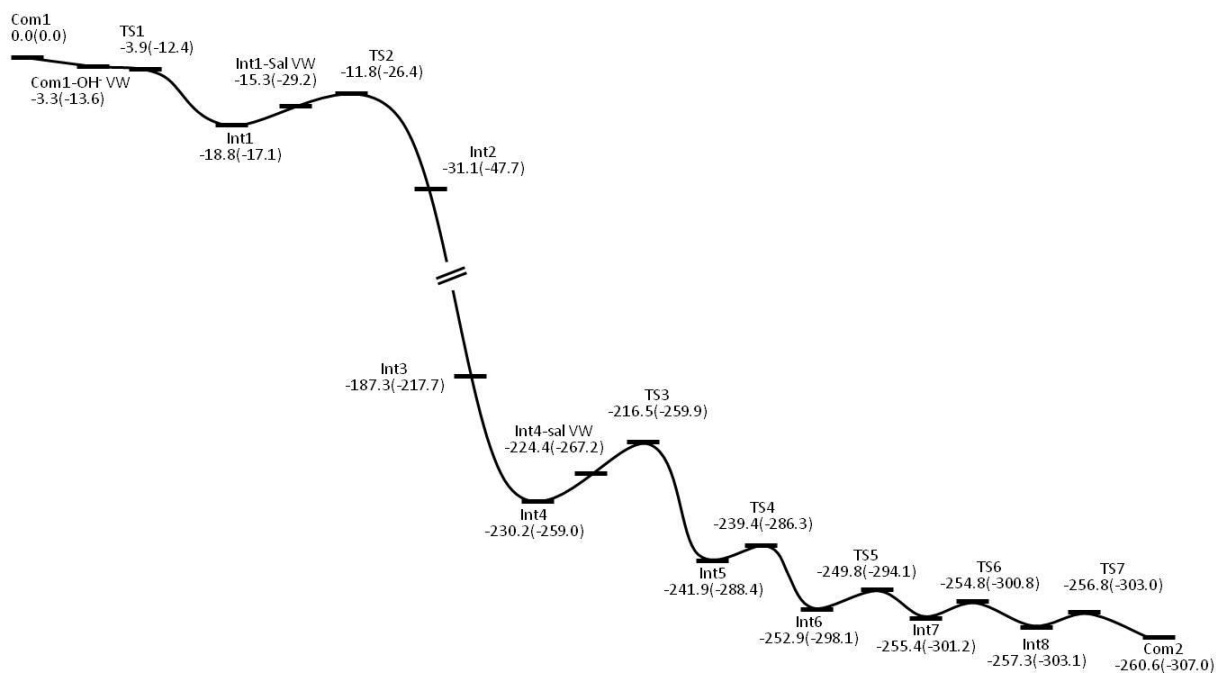

The optimized geometries for the structures depicted in Figure 5 by the M06/cep-121G method.

## Com1

Fe,0,0.0387671711,-0.1880368561,0.2549971829  
O,0,-1.2647511543,0.5640055102,-0.9812920387  
O,0,1.0181483634,-1.3863572846,1.6046481891  
O,0,1.2483408232,-3.498315392,2.4809173635  
O,0,1.3508707024,-0.6500423376,-1.1080326221  
O,0,-0.9508558292,0.683747138,1.8284450414  
O,0,-1.1857937709,2.5483022393,3.1510892268  
N,0,-1.144739714,-1.9335002869,0.2237778709  
N,0,1.2230950798,1.5188518594,0.6195228885  
C,0,-2.5730539,0.3158410374,-1.1432901871  
C,0,-3.4028032515,1.2960227915,-1.7708534772  
H,0,-2.9351327898,2.2295923112,-2.0853101026  
C,0,-4.7715071018,1.0616114455,-1.9675300939  
C,0,-5.3709143078,-0.1632779253,-1.5580756118  
H,0,-6.433673001,-0.3386595243,-1.7185691464  
C,0,-4.5718393602,-1.1400236648,-0.9509052624  
H,0,-5.0085037389,-2.0910351381,-0.6361684729  
C,0,-3.1781274641,-0.9267300471,-0.7251269624  
C,0,-2.4143559733,-2.0022279163,-0.1090187019  
C,0,-0.4806428788,-3.1147060283,0.809582983  
H,0,-0.0432705112,-3.7296024285,0.0049883056  
H,0,-1.1737447015,-3.7533643173,1.3790353782



C,0,0.6797665977,-2.6563127585,1.7196327218  
C,0,3.2621307578,0.745364377,-0.5176999487  
C,0,2.4945709419,1.6582391786,0.3172253045  
C,0,0.5561722004,2.5414692732,1.4496189947  
H,0,0.126309719,3.3223705867,0.7998915868  
H,0,1.2458431868,3.0342132963,2.152550159  
C,0,-0.6120148189,1.8952696241,2.2258108513  
H,0,-5.3830706303,1.8292707082,-2.4435228555  
H,0,-2.9679851239,-2.9366166259,0.0790461073  
H,0,3.0470261723,2.5269373782,0.711072054  
C,0,4.6569827455,1.0022310754,-0.6830238483  
H,0,5.0914197562,1.8597687528,-0.1633599248  
C,0,5.4598797995,0.1832601865,-1.4866855957  
H,0,6.5234243509,0.3889860995,-1.5985917347  
C,0,2.6599680086,-0.373453281,-1.2036110651  
C,0,3.4937091773,-1.1915165103,-2.0274609436  
C,0,4.86336965,-0.9204901499,-2.1598890931  
H,0,5.4779635536,-1.5645401743,-2.7902443566  
H,0,3.028274264,-2.0322132218,-2.5429661637

## Com1-OH<sup>-</sup> VW

Fe,0,-0.0783533025,0.2709430121,0.1696109931  
O,0,1.1917701113,-0.4245681239,-1.1237215088  
O,0,-1.0269963863,1.4984195506,1.5261415581  
O,0,-1.3149491245,3.6465767514,2.2908955124  
O,0,-1.4882066471,0.6155434071,-1.1245395879  
O,0,1.0529763326,-0.4980391052,1.6873650732  
O,0,1.5376011975,-2.3427712317,2.9670796584  
N,0,1.0431047617,2.0647256653,0.0190363616  
N,0,-1.1241028414,-1.5030318495,0.6387683785  
C,0,2.5222407646,-0.2448166931,-1.1402763755  
C,0,3.3791228327,-1.3246296705,-1.5170548813  
H,0,2.9135736371,-2.3017220635,-1.6758807188  
C,0,4.7661279952,-1.1278500151,-1.6086800949  
C,0,5.3499999514,0.1404117555,-1.3282873592  
H,0,6.4265848208,0.282397667,-1.4140319581  
C,0,4.5238482167,1.197049589,-0.9200676662  
H,0,4.9546063963,2.1711302784,-0.6747470232  
C,0,3.11307731,1.0252072625,-0.7950319089  
C,0,2.3161233489,2.1406754045,-0.2980308199  
C,0,0.3358122696,3.2471437942,0.5433902047  
H,0,-0.1819684984,3.7640630915,-0.2823076921  
H,0,1.0100959255,3.9729343393,1.0244327464

C,0,-0.7479761706,2.7870897053,1.5467978218  
C,0,-3.2649641614,-0.8971844727,-0.4143984514  
C,0,-2.3898249248,-1.7442814265,0.390915148  
C,0,-0.3173904085,-2.4707600054,1.3997296347  
H,0,0.1861115671,-3.1966260241,0.6811210574  
H,0,-0.9135607172,-3.0453081087,2.1273874584  
C,0,0.8296503808,-1.7387356646,2.0983463155  
H,0,5.4069792178,-1.9636592883,-1.8937580223  
H,0,2.8501438682,3.0958296947,-0.1629872091  
H,0,-2.8534325784,-2.6545494943,0.8064972084  
C,0,-4.6430457892,-1.2537675537,-0.5064303869  
H,0,-4.9894319039,-2.1280549605,0.0507268718  
C,0,-5.5420147399,-0.5118109413,-1.2858321787  
H,0,-6.5922477365,-0.7955223238,-1.3397437818  
C,0,-2.7791840507,0.2449480745,-1.1498067681  
C,0,-3.7070464628,0.9827727766,-1.9477181849  
C,0,-5.0598273388,0.6138972503,-2.0094827214  
H,0,-5.7474712433,1.1986378864,-2.6221737996  
H,0,-3.3271074463,1.8414724171,-2.5027021458  
O,0,1.343489607,-4.1212092608,-0.4424679952  
H,0,2.0789382493,-3.6408881261,0.0004022178

## TS1

Fe,0,0.0552251059,-0.2358685419,0.2427859966  
O,0,-1.1916953962,0.4507048017,-1.0955998565  
O,0,0.9965348313,-1.4444572548,1.6334221002  
O,0,1.1847003852,-3.5528025527,2.5297223387  
O,0,1.4039149909,-0.709401034,-1.0759165687  
O,0,-1.013266522,0.6310063162,1.7346686675  
O,0,-1.2397950204,2.4478558326,3.1240749975  
N,0,-1.153299694,-1.9779046832,0.2227058543  
N,0,1.2262430947,1.4780109904,0.6555337024  
C,0,-2.5167689544,0.2768540259,-1.1871322673  
C,0,-3.321465308,1.2910151,-1.7956864261  
H,0,-2.8189004196,2.2024516539,-2.1228189039  
C,0,-4.7062298346,1.119818893,-1.9389853826  
C,0,-5.3475084787,-0.0694015065,-1.4893905421  
H,0,-6.4226851942,-0.1955722157,-1.6093265953  
C,0,-4.5754583066,-1.0720651314,-0.8874510604  
H,0,-5.0471848453,-1.9922067104,-0.5333754421  
C,0,-3.1662974475,-0.9227600093,-0.7147498182  
C,0,-2.4297603031,-2.0122714078,-0.0878482037  
C,0,-0.5179512198,-3.1600266991,0.8343800464

H,0,-0.0799210582,-3.7944481308,0.0451948514  
H,0,-1.2284314152,-3.779076696,1.404810643  
C,0,0.6387372261,-2.706357243,1.7537344353  
C,0,3.2730486621,0.7562055227,-0.5230885964  
C,0,2.4855416078,1.6529797414,0.3215775364  
C,0,0.5085292389,2.4686333913,1.4418085835  
H,0,-0.0951633275,3.2519585845,0.668720546  
H,0,1.1549493723,3.079741351,2.0921378293  
C,0,-0.6301218461,1.826912136,2.1888335459  
H,0,-5.2987151064,1.910742124,-2.4012405477  
H,0,-3.0132629751,-2.921104689,0.1347732469  
H,0,3.0158040254,2.5440464045,0.6981560194  
C,0,4.6539641039,1.0560781175,-0.7124246543  
H,0,5.0666315562,1.9317136133,-0.2043209256  
C,0,5.4769325946,0.2595190248,-1.5242268076  
H,0,6.5308168879,0.5049176475,-1.6515897908  
C,0,2.7051319781,-0.3880735283,-1.1921610614  
C,0,3.554088728,-1.1840332166,-2.0204747428  
C,0,4.9138563843,-0.8684414485,-2.1801180679  
H,0,5.5399662427,-1.4965005979,-2.8157974384  
H,0,3.1085157622,-2.0440581467,-2.5226938853  
O,0,-0.8833355729,4.0908538929,-0.1795997173  
H,0,-1.8151145323,3.8609022783,0.0247063618

## Int1

Fe,0,-0.0181501678,0.3855390098,0.1986172071  
O,0,1.0729162114,-1.2482921815,-0.0710228036  
O,0,-0.7408746453,2.336130494,0.1106974875  
O,0,-0.6654103637,4.3623908609,-0.9731778718  
O,0,-1.3787678324,-0.2070380102,-1.0329383396  
O,0,1.0957812683,0.8715339375,1.7986329993  
O,0,1.2240046795,0.8438230771,4.1086968121  
N,0,1.3031417236,1.3013284616,-1.1905569104  
N,0,-1.3282117398,-0.233331171,1.7789103484  
C,0,2.3746065935,-1.3722692989,-0.3455127907  
C,0,3.0554523771,-2.586984143,-0.0051241363  
H,0,2.4760994344,-3.3670768368,0.4906868175  
C,0,4.4157925129,-2.7618436961,-0.2936919799  
C,0,5.163897068,-1.7392354611,-0.9447244528  
H,0,6.2199098609,-1.8838257554,-1.169158084  
C,0,4.5164119577,-0.5482034641,-1.2961428273  
H,0,5.0671663537,0.2477346763,-1.8044047718  
C,0,3.1340194432,-0.3336483759,-1.0062463964

C,0,2.5371693721,0.9232966222,-1.4363249055  
C,0,0.8201077799,2.5887676854,-1.7254372176  
H,0,0.3547685699,2.4281544263,-2.7129709096  
H,0,1.6280184768,3.3267859724,-1.8549402386  
C,0,-0.2709461329,3.164665666,-0.795272027  
C,0,-3.2282614909,-0.9897599927,0.3527423488  
C,0,-2.5505800309,-0.759897532,1.6229916027  
C,0,-0.7408315968,-0.0211430401,3.0060375684  
H,0,-1.2581401187,-0.2799141171,3.9358167644  
C,0,0.572557839,0.583608495,3.02183356  
H,0,4.9067213359,-3.695931972,-0.0158499112  
H,0,3.196381182,1.5895904441,-2.0182820313  
H,0,-3.1118935763,-1.0392376921,2.5303056614  
C,0,-4.5495431653,-1.5309468514,0.3730895195  
H,0,-4.9982179093,-1.7521746576,1.3463038786  
C,0,-5.2759558125,-1.7802160988,-0.8075848513  
H,0,-6.2842627511,-2.1928243463,-0.7524217303  
C,0,-2.6341314825,-0.7012838185,-0.9325295022  
C,0,-3.379661121,-0.9569241036,-2.117807947  
C,0,-4.6851366039,-1.4887141406,-2.0634674582  
H,0,-5.2345913651,-1.6755871003,-2.9878407731  
H,0,-2.9019691336,-0.7282849716,-3.0730417082

## Int1-Sal VW

Fe,0,0.9654283574,0.1260266442,0.1583517502  
O,0,2.4038202016,0.9091707321,-0.945290703  
O,0,-0.0958892357,-0.7254028114,1.742492678  
O,0,-0.0648771461,-1.5018218603,3.9013627855  
O,0,0.2440499763,1.8606083592,0.5874949181  
O,0,1.3556449871,-1.6976884328,-0.5937760047  
O,0,0.6829416445,-3.3389035927,-2.0761261483  
N,0,2.4563095633,-0.1131425104,1.6602901641  
N,0,-0.6719574215,-0.1001421528,-1.2041579285  
C,0,3.7152741256,0.6507491006,-0.9634561979  
C,0,4.4786933486,0.9501630651,-2.1385480673  
H,0,3.9446028482,1.3666210989,-2.9937146025  
C,0,5.8595873213,0.7141405825,-2.1847139067  
C,0,6.548620039,0.1757234433,-1.0603398559  
H,0,7.6222235363,-0.0026524356,-1.1030314369  
C,0,5.8230431003,-0.1162069942,0.1012716557  
H,0,6.3312045113,-0.5243076014,0.9788785212  
C,0,4.4136678736,0.10439614,0.1776849512  
C,0,3.7479783668,-0.2058854701,1.4342504865

C,0,1.9438797582,-0.4506464842,3.0032045079  
H,0,1.9288373075,0.4541810896,3.6343440843  
H,0,2.5625322925,-1.203631201,3.51662946  
C,0,0.4921529334,-0.9537181141,2.9012181845  
C,0,-1.8178018487,2.0520729689,-0.7029673369  
C,0,-1.6691836265,0.774309039,-1.3859893524  
C,0,-0.6067244553,-1.3107093361,-1.8604856544  
H,0,-1.3307722897,-1.5799870428,-2.6354560064  
C,0,0.5055397296,-2.1787189982,-1.5362426035  
H,0,6.4130415372,0.9486117719,-3.0953904538  
H,0,4.4092262494,-0.5446657119,2.249404505  
H,0,-2.4570883551,0.5173934988,-2.1131904493  
C,0,-2.9600103415,2.8523474,-1.0058200635  
H,0,-3.6685030312,2.4735261789,-1.7484089613  
C,0,-3.1927095381,4.0911322643,-0.3787420339  
H,0,-4.0774451932,4.6762835776,-0.6328395649  
C,0,-0.8751033298,2.5516608356,0.2695884402  
C,0,-1.1220969683,3.8062363225,0.8970320806  
C,0,-2.2656207206,4.5690951208,0.5824925775  
H,0,-2.431500451,5.5272314663,1.0782851697  
H,0,-0.3919693424,4.1578185045,1.6290876431  
H,0,-3.9517460245,-2.7365063803,-2.2445488444  
C,0,-4.1412820125,-1.952805509,-1.5053730267  
C,0,-5.2174830123,-1.0675067497,-1.6733707972  
C,0,-3.2868106528,-1.8852617986,-0.3678584773  
C,0,-5.4539306186,-0.0764445911,-0.682766342  
H,0,-5.8677334724,-1.1449153962,-2.5440098374  
C,0,-3.4968770016,-0.8405019327,0.5854108328  
C,0,-2.2746051638,-2.9496685159,-0.2159797184  
C,0,-4.602947684,0.0357666813,0.4284931468  
H,0,-6.2911318836,0.6141715637,-0.7906693761  
O,0,-2.7164168311,-0.6362687643,1.6978175418  
H,0,-2.1528001294,-3.5948258122,-1.1130903442  
O,0,-1.665143577,-3.2390719182,0.8559347833  
H,0,-4.7470420426,0.8126407076,1.1803876436  
H,0,-1.7570272081,-0.9519500388,1.6511335837

## TS2

|    |   |           |           |           |
|----|---|-----------|-----------|-----------|
| 26 | 0 | 0.921646  | 0.055596  | 0.287629  |
| 8  | 0 | 2.265860  | 0.938296  | -0.858363 |
| 8  | 0 | -0.006630 | -0.876143 | 1.868182  |
| 8  | 0 | 0.166615  | -1.837591 | 3.945081  |
| 8  | 0 | 0.199277  | 1.759539  | 0.850392  |

|   |   |           |           |           |
|---|---|-----------|-----------|-----------|
| 8 | 0 | 1.287128  | -1.709018 | -0.625266 |
| 8 | 0 | 0.616107  | -3.196546 | -2.253567 |
| 7 | 0 | 2.525803  | -0.263811 | 1.653961  |
| 7 | 0 | -0.756027 | -0.084547 | -1.027730 |
| 6 | 0 | 3.576519  | 0.709525  | -0.989347 |
| 6 | 0 | 4.247308  | 1.120405  | -2.186426 |
| 1 | 0 | 3.647721  | 1.599193  | -2.961639 |
| 6 | 0 | 5.622761  | 0.908842  | -2.354715 |
| 6 | 0 | 6.398063  | 0.285268  | -1.335387 |
| 1 | 0 | 7.466538  | 0.125148  | -1.473166 |
| 6 | 0 | 5.764250  | -0.112335 | -0.151722 |
| 1 | 0 | 6.339772  | -0.584984 | 0.648348  |
| 6 | 0 | 4.363263  | 0.083251  | 0.048566  |
| 6 | 0 | 3.796437  | -0.331345 | 1.323432  |
| 6 | 0 | 2.115125  | -0.711634 | 3.000661  |
| 1 | 0 | 2.153298  | 0.137288  | 3.704017  |
| 1 | 0 | 2.766132  | -1.505109 | 3.400482  |
| 6 | 0 | 0.654493  | -1.204179 | 2.958357  |
| 6 | 0 | -1.753051 | 2.139827  | -0.556902 |
| 6 | 0 | -1.675935 | 0.852536  | -1.238290 |
| 6 | 0 | -0.794434 | -1.318354 | -1.697749 |
| 1 | 0 | -1.375441 | -1.397793 | -2.624968 |
| 6 | 0 | 0.425046  | -2.127271 | -1.567832 |
| 1 | 0 | 6.104437  | 1.227777  | -3.280318 |
| 1 | 0 | 4.518711  | -0.729083 | 2.055961  |
| 1 | 0 | -2.450405 | 0.666328  | -2.000778 |
| 6 | 0 | -2.805838 | 3.032022  | -0.919052 |
| 1 | 0 | -3.504420 | 2.712473  | -1.698037 |
| 6 | 0 | -2.963223 | 4.284975  | -0.301602 |
| 1 | 0 | -3.777766 | 4.946050  | -0.597827 |
| 6 | 0 | -0.825140 | 2.546086  | 0.469998  |
| 6 | 0 | -0.999412 | 3.818800  | 1.091173  |
| 6 | 0 | -2.049683 | 4.675361  | 0.713235  |
| 1 | 0 | -2.159152 | 5.644234  | 1.203434  |
| 1 | 0 | -0.287899 | 4.104432  | 1.867987  |
| 1 | 0 | -3.971025 | -2.475402 | -2.491791 |
| 6 | 0 | -4.178293 | -1.799794 | -1.656128 |
| 6 | 0 | -5.324056 | -0.982878 | -1.672011 |
| 6 | 0 | -3.269617 | -1.793233 | -0.565682 |
| 6 | 0 | -5.573720 | -0.124943 | -0.569889 |
| 1 | 0 | -6.012999 | -1.014093 | -2.516185 |
| 6 | 0 | -3.513578 | -0.897997 | 0.516697  |
| 6 | 0 | -2.091778 | -2.712856 | -0.589845 |
| 6 | 0 | -4.676850 | -0.084864 | 0.513133  |

|   |   |           |           |           |
|---|---|-----------|-----------|-----------|
| 1 | 0 | -6.459389 | 0.511665  | -0.560523 |
| 8 | 0 | -2.688367 | -0.771727 | 1.616757  |
| 1 | 0 | -2.040425 | -3.352462 | -1.499252 |
| 8 | 0 | -1.527127 | -3.123885 | 0.502675  |
| 1 | 0 | -4.837156 | 0.584889  | 1.359485  |
| 1 | 0 | -1.786613 | -1.202231 | 1.539629  |

## Int2

|    |   |           |           |           |
|----|---|-----------|-----------|-----------|
| 26 | 0 | 0.970282  | -0.219991 | 0.537490  |
| 8  | 0 | 1.899799  | 0.905416  | -0.791473 |
| 8  | 0 | 0.585935  | -1.392065 | 2.150587  |
| 8  | 0 | 1.348814  | -2.380195 | 4.078139  |
| 8  | 0 | 0.239391  | 1.314904  | 1.485565  |
| 8  | 0 | 1.196863  | -1.877382 | -0.632074 |
| 8  | 0 | 0.331280  | -3.227453 | -2.274076 |
| 7  | 0 | 2.901580  | -0.441634 | 1.414347  |
| 7  | 0 | -0.804298 | -0.196098 | -0.615195 |
| 6  | 0 | 3.154005  | 0.880684  | -1.256586 |
| 6  | 0 | 3.450848  | 1.482609  | -2.521744 |
| 1  | 0 | 2.625920  | 1.938205  | -3.070740 |
| 6  | 0 | 4.755268  | 1.477274  | -3.035222 |
| 6  | 0 | 5.827156  | 0.883346  | -2.309079 |
| 1  | 0 | 6.837893  | 0.886655  | -2.714625 |
| 6  | 0 | 5.560680  | 0.302588  | -1.063105 |
| 1  | 0 | 6.368189  | -0.149543 | -0.481799 |
| 6  | 0 | 4.241080  | 0.283591  | -0.517684 |
| 6  | 0 | 4.055781  | -0.301146 | 0.800384  |
| 6  | 0 | 2.887921  | -1.012825 | 2.776488  |
| 1  | 0 | 3.022813  | -0.210700 | 3.521281  |
| 1  | 0 | 3.689794  | -1.751127 | 2.934564  |
| 6  | 0 | 1.517370  | -1.665653 | 3.042756  |
| 6  | 0 | -1.528600 | 2.081339  | -0.004916 |
| 6  | 0 | -1.560263 | 0.866345  | -0.806173 |
| 6  | 0 | -1.024099 | -1.370772 | -1.478161 |
| 1  | 0 | -1.249015 | -1.066129 | -2.517616 |
| 6  | 0 | 0.253795  | -2.234003 | -1.485016 |
| 1  | 0 | 4.950251  | 1.937015  | -4.005266 |
| 1  | 0 | 4.975310  | -0.637728 | 1.307350  |
| 1  | 0 | -2.291400 | 0.863771  | -1.630371 |
| 6  | 0 | -2.448154 | 3.120996  | -0.338809 |
| 1  | 0 | -3.107640 | 2.970177  | -1.197753 |
| 6  | 0 | -2.522173 | 4.302589  | 0.410302  |
| 1  | 0 | -3.230092 | 5.085669  | 0.142112  |

|   |   |           |           |           |
|---|---|-----------|-----------|-----------|
| 6 | 0 | -0.651697 | 2.249714  | 1.127227  |
| 6 | 0 | -0.747075 | 3.458136  | 1.886613  |
| 6 | 0 | -1.661407 | 4.461166  | 1.532965  |
| 1 | 0 | -1.710682 | 5.374493  | 2.127673  |
| 1 | 0 | -0.082228 | 3.571168  | 2.743851  |
| 1 | 0 | -3.954627 | -1.611457 | -3.011520 |
| 6 | 0 | -4.256540 | -1.141397 | -2.068380 |
| 6 | 0 | -5.356932 | -0.254916 | -2.046576 |
| 6 | 0 | -3.507185 | -1.424437 | -0.905027 |
| 6 | 0 | -5.709060 | 0.354672  | -0.813629 |
| 1 | 0 | -5.922542 | -0.046534 | -2.955503 |
| 6 | 0 | -3.866569 | -0.831111 | 0.366453  |
| 6 | 0 | -2.243770 | -2.266625 | -1.014442 |
| 6 | 0 | -4.985420 | 0.074381  | 0.360792  |
| 1 | 0 | -6.551019 | 1.050052  | -0.772599 |
| 8 | 0 | -3.184592 | -1.099598 | 1.491306  |
| 1 | 0 | -2.344081 | -3.019954 | -1.816322 |
| 8 | 0 | -1.945882 | -2.973820 | 0.207988  |
| 1 | 0 | -5.255714 | 0.542112  | 1.311494  |
| 1 | 0 | -2.262056 | -2.359974 | 0.952696  |

### Int3

Fe,0,-1.4091945464,-0.3104066942,-0.0289581772  
O,0,-2.9517589898,0.5276068115,0.5230115591  
O,0,-0.1620805778,-1.3455683663,-1.3020132047  
O,0,0.7267203754,-3.4548620709,-1.2871401962  
O,0,-0.3946073465,1.1396021762,-1.1046145078  
O,0,-0.4228741406,-1.052150872,1.4602845333  
O,0,1.0567167143,-2.512573289,2.4175815379  
N,0,-2.5008386032,-2.0126161708,-0.4583228406  
N,0,1.4319633574,0.6563226584,0.7186640372  
C,0,-4.2721448755,0.2131466322,0.4972509202  
C,0,-5.2197386114,1.1748141845,0.9277995553  
H,0,-4.8562861556,2.1459239412,1.260738233  
C,0,-6.5908295213,0.864271813,0.9177730445  
C,0,-7.0476958599,-0.4082906691,0.4838102111  
H,0,-8.1112028753,-0.6388005477,0.4818935165  
C,0,-6.1158503656,-1.3650716548,0.0587725645  
H,0,-6.448835577,-2.3485783273,-0.2772493864  
C,0,-4.7183447508,-1.0802105779,0.0538775791  
C,0,-3.8105785324,-2.1261910658,-0.3908689112  
C,0,-1.679978744,-3.16786107,-0.8900650353  
H,0,-2.0997459991,-3.6629560157,-1.7792749737



H,0,-1.6118228198,-3.916639003,-0.0866776007  
C,0,-0.2623878131,-2.6829022715,-1.2005841505  
C,0,0.4313923194,2.8508278101,0.43400246  
C,0,1.1768692336,1.8520326087,1.1928883431  
C,0,1.9713717509,-0.4226784514,1.5486767516  
H,0,2.3919769332,-0.0663062332,2.5036118258  
C,0,0.800162111,-1.423635485,1.8499983661  
H,0,-7.3097038314,1.6129608342,1.2494381171  
H,0,-4.277666674,-3.0780499357,-0.681825684  
H,0,1.4889873676,2.1102200351,2.2145408703  
C,0,0.401793991,4.2026947793,0.8736677769  
H,0,1.0008288107,4.4897548342,1.738963114  
C,0,-0.3845231273,5.1531736541,0.2031380114  
H,0,-0.3942333789,6.1884670158,0.5382428176  
C,0,-0.373710044,2.4675025566,-0.6869250002  
C,0,-1.1840278857,3.415068425,-1.342700294  
C,0,-1.178016974,4.7543656508,-0.9021166972  
H,0,-1.7969652733,5.4885245459,-1.4166289067  
H,0,-1.7996283978,3.0906051039,-2.1804295741  
H,0,5.5007291315,-0.9667476821,1.8677063643  
C,0,5.4170834673,-0.2364317323,1.0600673166  
C,0,6.5022657147,0.6181694016,0.7695256937  
C,0,4.2149664167,-0.1739126769,0.3213661994  
C,0,6.3941282392,1.5478122905,-0.2900317765  
H,0,7.4183515045,0.5519740851,1.3545685493  
C,0,4.1104387783,0.7799380332,-0.7473166674  
C,0,3.0768622112,-1.1154033372,0.692695798  
C,0,5.2097465985,1.6242865237,-1.0468220712  
H,0,7.2284062655,2.2069070316,-0.5286443031  
O,0,2.9705886372,0.9231729929,-1.5083863598  
H,0,3.4431754514,-2.0096603892,1.2134701207  
O,0,2.4015426441,-1.5076829811,-0.5520121323  
H,0,5.1027028516,2.3306252387,-1.8697762681  
H,0,2.1230748712,-2.4515232258,-0.6939632439  
Fe,0,1.3325225435,0.0897191279,-1.3129328246

## Int4

Fe,0,-1.4234904644,-0.3374915902,-0.0745243505  
O,0,-2.8920546535,0.6842545667,0.411368188  
O,0,-0.223035725,-1.4113891617,-1.2888553745  
O,0,0.469916741,-3.6220085826,-1.2432379261  
O,0,-0.2491704041,1.0898533816,-1.0965430905  
O,0,-0.6011110651,-1.1027785537,1.5203282959

O,0,0.6773030903,-2.7625296069,2.4497341159  
N,0,-2.6621188971,-1.9243530037,-0.5837413613  
N,0,1.4522879859,0.3509068681,0.7853443607  
C,0,-4.2349881243,0.464958446,0.3857343107  
C,0,-5.103729985,1.5156459108,0.7820729918  
H,0,-4.6556130704,2.4661050452,1.0720111721  
C,0,-6.4961672831,1.3244826428,0.7975815706  
C,0,-7.0522053864,0.0714821854,0.4257745894  
H,0,-8.130979844,-0.078015949,0.4416788974  
C,0,-6.2016046714,-0.9743739744,0.0392119815  
H,0,-6.61763634,-1.9425311398,-0.2478786231  
C,0,-4.7831599487,-0.8107952187,-0.0015007522  
C,0,-3.9787394965,-1.9540860836,-0.4078858371  
C,0,-1.8737783225,-3.0337197391,-0.8906724068  
H,0,-2.2736902054,-4.046862671,-0.8510450467  
C,0,-0.5070198603,-2.7766378858,-1.1644498969  
C,0,0.6977128704,2.6466849258,0.5327879644  
C,0,1.3075575746,1.5531920258,1.2841752885  
C,0,1.8498408969,-0.7958762394,1.6040934372  
H,0,2.2931415548,-0.5009911843,2.5711343268  
C,0,0.5598113969,-1.6428519337,1.8884204289  
H,0,-7.1489076594,2.1432412295,1.1005472641  
H,0,-4.5105387221,-2.902202478,-0.5717131825  
H,0,1.6129548219,1.7523082044,2.3218065321  
C,0,0.8003484784,3.9807326752,1.0153213205  
H,0,1.3930592138,4.1729531764,1.9111003563  
C,0,0.1540872544,5.0342037384,0.3495650566  
H,0,0.2467199657,6.0540447217,0.7184011091  
C,0,-0.0979828194,2.3844036426,-0.6306408256  
C,0,-0.7681094004,3.4421195487,-1.2821445843  
C,0,-0.6324006865,4.7586161108,-0.7981645641  
H,0,-1.144552315,5.5720458585,-1.311559435  
H,0,-1.3810469351,3.2132337667,-2.1531903645  
H,0,5.2690022141,-1.6683902675,2.0504143525  
C,0,5.2919969366,-0.9314929571,1.2440251455  
C,0,6.4647032911,-0.1819979268,1.0099098409  
C,0,4.1348708092,-0.7582701641,0.4516164946  
C,0,6.4891501791,0.7543047653,-0.0491717041  
H,0,7.3432501391,-0.3327599039,1.6359770943  
C,0,4.1617676103,0.2047686536,-0.6144003771  
C,0,2.8980788963,-1.5944545705,0.762914152  
C,0,5.3506510224,0.9414417534,-0.8562478731  
H,0,7.3904179219,1.3344911673,-0.2479525366  
O,0,3.0762897199,0.4623963287,-1.4222375419

H,0,3.1611686623,-2.5201937173,1.2938625949  
O,0,2.2645253383,-1.9109377376,-0.5137716961  
H,0,5.3473685995,1.6578364509,-1.6781621697  
H,0,1.7478104366,-2.7753292395,-0.6455442783  
Fe,0,1.3350516631,-0.1841563108,-1.2490974342

## Int4-Sal VW

|    |   |          |          |          |
|----|---|----------|----------|----------|
| Fe | 0 | -0.59515 | 0.31498  | 0.85105  |
| O  | 0 | -1.71982 | 1.76891  | 1.0306   |
| O  | 0 | 0.09063  | -1.39229 | 0.06817  |
| O  | 0 | 0.29486  | -3.59357 | 0.72813  |
| O  | 0 | 0.49451  | 0.88275  | -0.86886 |
| O  | 0 | 0.47653  | 0.0175   | 2.44894  |
| O  | 0 | 1.59503  | -1.59313 | 3.63759  |
| N  | 0 | -2.18653 | -0.98608 | 1.18349  |
| N  | 0 | 2.47247  | 0.45179  | 0.79692  |
| C  | 0 | -3.05681 | 1.90706  | 1.24487  |
| C  | 0 | -3.61768 | 3.21118  | 1.23299  |
| H  | 0 | -2.95544 | 4.05083  | 1.02149  |
| C  | 0 | -4.987   | 3.40049  | 1.49151  |
| C  | 0 | -5.82168 | 2.28863  | 1.78109  |
| H  | 0 | -6.87972 | 2.43601  | 1.99401  |
| C  | 0 | -5.27423 | 0.99678  | 1.7893   |
| H  | 0 | -5.90924 | 0.13286  | 1.99888  |
| C  | 0 | -3.89459 | 0.76631  | 1.50735  |
| C  | 0 | -3.42699 | -0.61153 | 1.47706  |
| C  | 0 | -1.74673 | -2.31274 | 1.17235  |
| H  | 0 | -2.35287 | -3.1178  | 1.5887   |
| C  | 0 | -0.43922 | -2.5297  | 0.67093  |
| C  | 0 | 2.11782  | 2.60339  | -0.27179 |
| C  | 0 | 2.70402  | 1.73949  | 0.75195  |
| C  | 0 | 2.85945  | -0.38886 | 1.92927  |
| H  | 0 | 3.58196  | 0.10275  | 2.60487  |
| C  | 0 | 1.5577   | -0.70518 | 2.74793  |
| H  | 0 | -5.40412 | 4.40755  | 1.47624  |
| H  | 0 | -4.17217 | -1.3902  | 1.6991   |
| H  | 0 | 3.31829  | 2.21291  | 1.53193  |
| C  | 0 | 2.58775  | 3.93527  | -0.43691 |
| H  | 0 | 3.43711  | 4.27229  | 0.15953  |
| C  | 0 | 1.9699   | 4.80291  | -1.35214 |
| H  | 0 | 2.34306  | 5.81717  | -1.48181 |
| C  | 0 | 0.98911  | 2.16328  | -1.03893 |
| C  | 0 | 0.34824  | 3.04761  | -1.93231 |

|    |   |          |          |          |
|----|---|----------|----------|----------|
| C  | 0 | 0.84599  | 4.35603  | -2.09334 |
| H  | 0 | 0.35544  | 5.03243  | -2.79288 |
| H  | 0 | -0.52473 | 2.69231  | -2.4794  |
| H  | 0 | 6.08299  | -1.91288 | 2.09673  |
| C  | 0 | 6.02234  | -1.53848 | 1.07213  |
| C  | 0 | 7.2046   | -1.26321 | 0.35255  |
| C  | 0 | 4.74688  | -1.35053 | 0.49471  |
| C  | 0 | 7.11263  | -0.80185 | -0.98078 |
| H  | 0 | 8.17689  | -1.416   | 0.81947  |
| C  | 0 | 4.65916  | -0.86214 | -0.85452 |
| C  | 0 | 3.50847  | -1.67626 | 1.32249  |
| C  | 0 | 5.8527   | -0.60762 | -1.57924 |
| H  | 0 | 8.01722  | -0.59617 | -1.55335 |
| O  | 0 | 3.46102  | -0.61819 | -1.48809 |
| H  | 0 | 3.73831  | -2.38292 | 2.13215  |
| O  | 0 | 2.53838  | -2.26891 | 0.4033   |
| H  | 0 | 5.75982  | -0.25039 | -2.60516 |
| H  | 0 | 1.85751  | -2.94139 | 0.73263  |
| Fe | 0 | 1.73318  | -0.73747 | -0.79277 |
| C  | 0 | -3.76977 | -0.53214 | -1.73167 |
| C  | 0 | -3.5734  | -1.93883 | -1.56138 |
| C  | 0 | -5.03498 | 0.04424  | -1.48165 |
| C  | 0 | -4.65697 | -2.73886 | -1.10324 |
| C  | 0 | -6.0955  | -0.77215 | -1.05182 |
| H  | 0 | -5.15755 | 1.1196   | -1.61286 |
| C  | 0 | -5.91234 | -2.16701 | -0.84707 |
| H  | 0 | -4.49081 | -3.80943 | -0.96236 |
| H  | 0 | -7.06857 | -0.32071 | -0.85726 |
| H  | 0 | -6.74087 | -2.78434 | -0.50406 |
| O  | 0 | -2.74718 | 0.30275  | -2.13736 |
| H  | 0 | -1.92377 | -0.23499 | -2.31588 |
| C  | 0 | -2.28587 | -2.56044 | -1.87826 |
| H  | 0 | -2.19968 | -3.64824 | -1.68995 |
| O  | 0 | -1.30833 | -1.92307 | -2.3864  |

### Ts3

|    |   |          |          |          |
|----|---|----------|----------|----------|
| 26 | 0 | -0.53309 | 0.48972  | 0.39482  |
| 8  | 0 | -1.64368 | 1.93883  | 0.63473  |
| 8  | 0 | 0.19207  | -1.21483 | -0.41213 |
| 8  | 0 | 0.25638  | -3.44648 | 0.1326   |
| 8  | 0 | 0.76234  | 1.11172  | -1.09975 |
| 8  | 0 | 0.37688  | 0.05125  | 2.07229  |
| 8  | 0 | 1.28972  | -1.66335 | 3.29123  |

|   |   |          |          |          |
|---|---|----------|----------|----------|
| 7 | 0 | -2.13874 | -0.79666 | 0.63655  |
| 7 | 0 | 2.57106  | 0.51857  | 0.72405  |
| 6 | 0 | -2.94275 | 2.08566  | 1.01663  |
| 6 | 0 | -3.46632 | 3.39347  | 1.17505  |
| 1 | 0 | -2.81134 | 4.23879  | 0.96599  |
| 6 | 0 | -4.7961  | 3.57676  | 1.59467  |
| 6 | 0 | -5.62525 | 2.45847  | 1.87028  |
| 1 | 0 | -6.65244 | 2.60397  | 2.20112  |
| 6 | 0 | -5.11185 | 1.16158  | 1.71327  |
| 1 | 0 | -5.73998 | 0.29285  | 1.92158  |
| 6 | 0 | -3.77211 | 0.94121  | 1.27791  |
| 6 | 0 | -3.33138 | -0.43626 | 1.08944  |
| 6 | 0 | -1.80541 | -2.15589 | 0.37653  |
| 1 | 0 | -2.31849 | -2.94087 | 0.93999  |
| 6 | 0 | -0.40089 | -2.35322 | 0.06532  |
| 6 | 0 | 2.32964  | 2.75373  | -0.19567 |
| 6 | 0 | 2.79227  | 1.80571  | 0.81489  |
| 6 | 0 | 2.79732  | -0.40315 | 1.83802  |
| 1 | 0 | 3.44332  | 0.02229  | 2.62524  |
| 6 | 0 | 1.39101  | -0.72233 | 2.46418  |
| 1 | 0 | -5.18814 | 4.58702  | 1.71181  |
| 1 | 0 | -4.0547  | -1.21983 | 1.35776  |
| 1 | 0 | 3.30424  | 2.21065  | 1.6998   |
| 6 | 0 | 2.82695  | 4.08582  | -0.20053 |
| 1 | 0 | 3.60098  | 4.36166  | 0.51715  |
| 6 | 0 | 2.33307  | 5.02896  | -1.11606 |
| 1 | 0 | 2.72707  | 6.04347  | -1.12265 |
| 6 | 0 | 1.29467  | 2.39383  | -1.11891 |
| 6 | 0 | 0.78014  | 3.34921  | -2.01922 |
| 6 | 0 | 1.30782  | 4.65635  | -2.02185 |
| 1 | 0 | 0.91528  | 5.38894  | -2.72642 |
| 1 | 0 | -0.01913 | 3.05328  | -2.69747 |
| 1 | 0 | 5.94564  | -2.07017 | 2.25931  |
| 6 | 0 | 6.00443  | -1.63669 | 1.25841  |
| 6 | 0 | 7.26478  | -1.36907 | 0.68117  |
| 6 | 0 | 4.80508  | -1.36262 | 0.56471  |
| 6 | 0 | 7.33342  | -0.82822 | -0.62328 |
| 1 | 0 | 8.17545  | -1.58901 | 1.23675  |
| 6 | 0 | 4.88315  | -0.79904 | -0.75448 |
| 6 | 0 | 3.46982  | -1.67605 | 1.23082  |
| 6 | 0 | 6.15228  | -0.5508  | -1.33732 |
| 1 | 0 | 8.30084  | -0.62684 | -1.08305 |
| 8 | 0 | 3.76785  | -0.47116 | -1.49393 |
| 1 | 0 | 3.57569  | -2.44411 | 2.00886  |

|    |   |          |          |          |
|----|---|----------|----------|----------|
| 8  | 0 | 2.57647  | -2.15751 | 0.17264  |
| 1  | 0 | 6.1798   | -0.13352 | -2.34387 |
| 1  | 0 | 1.88966  | -2.86174 | 0.37175  |
| 26 | 0 | 1.9812   | -0.53227 | -1.00312 |
| 6  | 0 | -4.48819 | -0.92722 | -1.6141  |
| 6  | 0 | -3.97333 | -2.21334 | -1.26923 |
| 6  | 0 | -5.83097 | -0.5904  | -1.31704 |
| 6  | 0 | -4.82887 | -3.14452 | -0.6285  |
| 6  | 0 | -6.66042 | -1.5312  | -0.68001 |
| 1  | 0 | -6.19269 | 0.40181  | -1.58845 |
| 6  | 0 | -6.16514 | -2.81685 | -0.33383 |
| 1  | 0 | -4.4288  | -4.12714 | -0.36323 |
| 1  | 0 | -7.69321 | -1.26756 | -0.45046 |
| 1  | 0 | -6.81539 | -3.54257 | 0.1533   |
| 8  | 0 | -3.69382 | 0.00835  | -2.25415 |
| 1  | 0 | -2.80705 | -0.44899 | -2.46017 |
| 6  | 0 | -2.53968 | -2.53665 | -1.54643 |
| 1  | 0 | -2.27481 | -3.60998 | -1.45867 |
| 8  | 0 | -1.87198 | -1.79344 | -2.40769 |

## Int5

|    |                 |                 |                 |
|----|-----------------|-----------------|-----------------|
| Fe | -1.000878119087 | 0.300000309020  | -0.136248937321 |
| O  | -2.144763583881 | 1.493717579253  | 0.759240667832  |
| O  | 0.159502087767  | -1.399946497390 | -0.659338784421 |
| O  | 0.392463786296  | -3.582592752792 | -0.008731413458 |
| O  | 0.662858468193  | 1.000025092412  | -1.250439485266 |
| O  | 0.090971082069  | 0.069155044854  | 1.686242332122  |
| O  | 0.904435574942  | -1.594839655545 | 3.054687630586  |
| N  | -2.170865432968 | -1.295959386704 | 0.536878295240  |
| N  | 2.398904164261  | 0.681009091910  | 0.714491088823  |
| C  | -3.052817786653 | 1.310049494185  | 1.739843761519  |
| C  | -3.563329043753 | 2.449128907625  | 2.424769685887  |
| H  | -3.180407945865 | 3.428381636903  | 2.138262467917  |
| C  | -4.527094375964 | 2.305217904797  | 3.435457114782  |
| C  | -5.022770628061 | 1.021917163765  | 3.792558913916  |
| H  | -5.773080164352 | 0.917575322816  | 4.574438112334  |
| C  | -4.536833371708 | -0.107452519420 | 3.121163450792  |
| H  | -4.911285004331 | -1.101388389510 | 3.375439101334  |
| C  | -3.547821848897 | 0.002333110636  | 2.097510576908  |
| C  | -3.119397825488 | -1.225504795351 | 1.439315808980  |
| C  | -1.863942626165 | -2.565867641674 | -0.148952692550 |
| H  | -2.194744667715 | -3.433459598997 | 0.442190401596  |
| C  | -0.330064590028 | -2.586446163846 | -0.281808694058 |

|    |                 |                 |                 |
|----|-----------------|-----------------|-----------------|
| C  | 1.922600082769  | 2.849061389258  | -0.266805834445 |
| C  | 2.416171731912  | 1.983510486568  | 0.803855398196  |
| C  | 2.533445171282  | -0.203964844928 | 1.871602858563  |
| H  | 3.021691801362  | 0.276629974429  | 2.736189568386  |
| C  | 1.051806836818  | -0.622316103346 | 2.253031605931  |
| H  | -4.900039975048 | 3.191818362040  | 3.948826843377  |
| H  | -3.649326216983 | -2.145015688121 | 1.733230911758  |
| H  | 2.754496826474  | 2.462033454353  | 1.734450068448  |
| C  | 2.218960298403  | 4.239450322802  | -0.257402568223 |
| H  | 2.889201671894  | 4.629262805176  | 0.510389120864  |
| C  | 1.660390088289  | 5.097181793763  | -1.219164686196 |
| H  | 1.903177733266  | 6.158225897018  | -1.212586340931 |
| C  | 1.018150207614  | 2.337353114604  | -1.254264774694 |
| C  | 0.435382819996  | 3.206039532888  | -2.202604899291 |
| C  | 0.765636564219  | 4.575837410099  | -2.187936324248 |
| H  | 0.321454422473  | 5.241006666729  | -2.927905759988 |
| H  | -0.263778762924 | 2.791979504700  | -2.928636432720 |
| H  | 5.756557115361  | -1.615135008329 | 2.587743117070  |
| C  | 5.862265234675  | -1.233014749228 | 1.569761534436  |
| C  | 7.142877810375  | -0.920966551185 | 1.065628947398  |
| C  | 4.700219085264  | -1.071799938164 | 0.782601550190  |
| C  | 7.270929466302  | -0.451382178700 | -0.261512032771 |
| H  | 8.023201016913  | -1.052833856944 | 1.693351529252  |
| C  | 4.836421700227  | -0.580136075470 | -0.561600424456 |
| C  | 3.347508165505  | -1.438230537231 | 1.382766829970  |
| C  | 6.128425258114  | -0.287535444531 | -1.068574014414 |
| H  | 8.254692806552  | -0.215882378681 | -0.667551559656 |
| O  | 3.760185509108  | -0.366237340623 | -1.400075784175 |
| H  | 3.445920264308  | -2.167810417976 | 2.196805647425  |
| O  | 2.551518304229  | -2.016689756628 | 0.291998294257  |
| H  | 6.203834622618  | 0.074825933230  | -2.093988721633 |
| H  | 1.961538031006  | -2.797679482433 | 0.469583794931  |
| Fe | 1.956861260520  | -0.473119334266 | -0.965380514414 |
| C  | -3.317835597713 | -0.223154731329 | -1.864060170829 |
| C  | -3.651283129902 | -1.611131839052 | -1.767506535658 |
| C  | -4.347869466724 | 0.739163982115  | -1.998863299981 |
| C  | -5.005548189443 | -2.003323644083 | -1.806412764555 |
| C  | -5.698512000829 | 0.328018025347  | -2.033517921306 |
| H  | -4.071155989957 | 1.792925265555  | -2.061236695636 |
| C  | -6.034612613756 | -1.042229630208 | -1.937810857429 |
| H  | -5.253010499388 | -3.065123744000 | -1.731614705593 |
| H  | -6.485268631517 | 1.076783426237  | -2.134519808919 |
| H  | -7.077432849120 | -1.357424076219 | -1.965259503143 |
| O  | -1.993011907467 | 0.154850796452  | -1.810357631282 |

|   |                 |                 |                 |
|---|-----------------|-----------------|-----------------|
| H | -1.283364386783 | -1.536763646487 | -2.697574618086 |
| C | -2.533908283647 | -2.629960721997 | -1.603793262749 |
| H | -2.932230836367 | -3.646856078676 | -1.718236161063 |
| O | -1.532704718886 | -2.492433601768 | -2.649303415138 |

## Ts4

|    |   |          |          |          |
|----|---|----------|----------|----------|
| 26 | 0 | -1.08455 | 0.28089  | 0.16819  |
| 8  | 0 | -2.2878  | 0.83133  | 1.51574  |
| 8  | 0 | 0.11122  | -0.86993 | -1.16823 |
| 8  | 0 | 0.2606   | -3.04741 | -1.86781 |
| 8  | 0 | 0.95967  | 1.59891  | -0.95446 |
| 8  | 0 | -0.06352 | -0.77409 | 1.5789   |
| 8  | 0 | 0.71128  | -2.92056 | 1.83676  |
| 7  | 0 | -2.28596 | -1.35865 | -0.21419 |
| 7  | 0 | 2.25694  | 0.18039  | 0.89751  |
| 6  | 0 | -3.17151 | 0.11758  | 2.2421   |
| 6  | 0 | -3.67355 | 0.66934  | 3.45566  |
| 1  | 0 | -3.30147 | 1.6463   | 3.76328  |
| 6  | 0 | -4.61624 | -0.03076 | 4.22384  |
| 6  | 0 | -5.10261 | -1.29994 | 3.80492  |
| 1  | 0 | -5.83809 | -1.83366 | 4.40422  |
| 6  | 0 | -4.62762 | -1.8512  | 2.60889  |
| 1  | 0 | -4.9945  | -2.82107 | 2.26639  |
| 6  | 0 | -3.65575 | -1.17364 | 1.81126  |
| 6  | 0 | -3.23462 | -1.81173 | 0.57241  |
| 6  | 0 | -1.96233 | -2.015   | -1.49661 |
| 1  | 0 | -2.35214 | -3.04346 | -1.53061 |
| 6  | 0 | -0.42344 | -2.03959 | -1.55143 |
| 6  | 0 | 2.06638  | 2.60494  | 0.97474  |
| 6  | 0 | 2.37248  | 1.30434  | 1.55849  |
| 6  | 0 | 2.36016  | -1.13487 | 1.5317   |
| 1  | 0 | 2.83074  | -1.09469 | 2.52944  |
| 6  | 0 | 0.89082  | -1.67976 | 1.66622  |
| 1  | 0 | -4.98216 | 0.40836  | 5.15227  |
| 1  | 0 | -3.76469 | -2.73519 | 0.29309  |
| 1  | 0 | 2.67899  | 1.28216  | 2.61465  |
| 6  | 0 | 2.39238  | 3.78947  | 1.69562  |
| 1  | 0 | 2.92667  | 3.69511  | 2.64291  |
| 6  | 0 | 2.03699  | 5.05301  | 1.20168  |
| 1  | 0 | 2.30042  | 5.95301  | 1.75451  |
| 6  | 0 | 1.34146  | 2.71443  | -0.26259 |
| 6  | 0 | 0.96167  | 3.99357  | -0.74029 |
| 6  | 0 | 1.31599  | 5.14767  | -0.01875 |



|    |   |          |          |          |
|----|---|----------|----------|----------|
| 1  | 0 | 1.02614  | 6.1266   | -0.40064 |
| 1  | 0 | 0.39367  | 4.04904  | -1.66864 |
| 1  | 0 | 5.51924  | -2.8212  | 1.69935  |
| 6  | 0 | 5.69704  | -1.99963 | 1.00138  |
| 6  | 0 | 7.00744  | -1.51465 | 0.80488  |
| 6  | 0 | 4.59538  | -1.45091 | 0.30714  |
| 6  | 0 | 7.22634  | -0.46509 | -0.11681 |
| 1  | 0 | 7.84051  | -1.95368 | 1.3525   |
| 6  | 0 | 4.82223  | -0.37733 | -0.62107 |
| 6  | 0 | 3.20668  | -2.02151 | 0.56813  |
| 6  | 0 | 6.14549  | 0.09397  | -0.82565 |
| 1  | 0 | 8.23404  | -0.08463 | -0.28508 |
| 8  | 0 | 3.80779  | 0.23211  | -1.32502 |
| 1  | 0 | 3.2562   | -3.04667 | 0.95839  |
| 8  | 0 | 2.49965  | -2.01602 | -0.71992 |
| 1  | 0 | 6.2933   | 0.90363  | -1.54075 |
| 1  | 0 | 1.87007  | -2.75205 | -0.9295  |
| 26 | 0 | 1.96618  | -0.02193 | -1.14923 |
| 6  | 0 | -3.24513 | 0.98557  | -1.63925 |
| 6  | 0 | -3.61359 | -0.19943 | -2.34955 |
| 6  | 0 | -4.23695 | 1.92537  | -1.27317 |
| 6  | 0 | -4.96921 | -0.42266 | -2.66855 |
| 6  | 0 | -5.59003 | 1.68369  | -1.59906 |
| 1  | 0 | -3.93399 | 2.82169  | -0.73014 |
| 6  | 0 | -5.9635  | 0.51028  | -2.29373 |
| 1  | 0 | -5.24395 | -1.32985 | -3.2122  |
| 1  | 0 | -6.3497  | 2.41067  | -1.30939 |
| 1  | 0 | -7.00807 | 0.32641  | -2.54412 |
| 8  | 0 | -1.91561 | 1.18378  | -1.31455 |
| 1  | 0 | -1.18181 | 0.26935  | -2.94109 |
| 6  | 0 | -2.52713 | -1.18757 | -2.74818 |
| 1  | 0 | -2.93208 | -1.92799 | -3.45077 |
| 8  | 0 | -1.4534  | -0.52324 | -3.47025 |

## Int6

|    |   |          |          |          |
|----|---|----------|----------|----------|
| 26 | 0 | 1.29265  | -0.85152 | -0.26095 |
| 8  | 0 | 2.69821  | -1.79882 | -1.13072 |
| 8  | 0 | -0.04058 | -0.49175 | 1.38118  |
| 8  | 0 | -0.10211 | -0.06281 | 3.63442  |
| 8  | 0 | -1.43854 | 1.81841  | 0.59247  |
| 8  | 0 | -0.13585 | -1.48942 | -1.35506 |
| 8  | 0 | -1.10788 | -3.33017 | -2.31409 |
| 7  | 0 | 2.58106  | -0.66279 | 1.36341  |

|   |   |          |          |          |
|---|---|----------|----------|----------|
| 7 | 0 | -2.40313 | -0.16038 | -1.07461 |
| 6 | 0 | 3.97836  | -2.09752 | -0.83749 |
| 6 | 0 | 4.77048  | -2.78482 | -1.80219 |
| 1 | 0 | 4.30568  | -3.04686 | -2.7523  |
| 6 | 0 | 6.1074   | -3.10807 | -1.52469 |
| 6 | 0 | 6.70482  | -2.75886 | -0.28071 |
| 1 | 0 | 7.7437   | -3.01342 | -0.07834 |
| 6 | 0 | 5.9394   | -2.08471 | 0.67719  |
| 1 | 0 | 6.37571  | -1.80513 | 1.63841  |
| 6 | 0 | 4.57487  | -1.74609 | 0.42497  |
| 6 | 0 | 3.84407  | -1.02993 | 1.45047  |
| 6 | 0 | 2.02165  | 0.1927   | 2.42447  |
| 1 | 0 | 2.52211  | 0.01278  | 3.3883   |
| 6 | 0 | 0.53484  | -0.14607 | 2.5637   |
| 6 | 0 | -2.3256  | 2.22952  | -1.64247 |
| 6 | 0 | -2.57343 | 0.82676  | -1.92709 |
| 6 | 0 | -2.56799 | -1.5597  | -1.50511 |
| 1 | 0 | -3.19348 | -1.65946 | -2.4059  |
| 6 | 0 | -1.16809 | -2.19544 | -1.7724  |
| 1 | 0 | 6.69604  | -3.63496 | -2.27607 |
| 1 | 0 | 4.41026  | -0.76723 | 2.35749  |
| 1 | 0 | -2.91233 | 0.58919  | -2.94625 |
| 6 | 0 | -2.60583 | 3.18415  | -2.66669 |
| 1 | 0 | -3.03931 | 2.83009  | -3.60406 |
| 6 | 0 | -2.32727 | 4.54439  | -2.48432 |
| 1 | 0 | -2.54751 | 5.26222  | -3.27224 |
| 6 | 0 | -1.74527 | 2.6808   | -0.40646 |
| 6 | 0 | -1.4487  | 4.06039  | -0.23893 |
| 6 | 0 | -1.74083 | 4.97594  | -1.26326 |
| 1 | 0 | -1.51087 | 6.03146  | -1.11779 |
| 1 | 0 | -0.99387 | 4.37649  | 0.70004  |
| 1 | 0 | -5.5582  | -3.44233 | -0.98528 |
| 6 | 0 | -5.71711 | -2.55791 | -0.36379 |
| 6 | 0 | -7.02854 | -2.1623  | -0.02848 |
| 6 | 0 | -4.58968 | -1.83708 | 0.09479  |
| 6 | 0 | -7.22041 | -1.02987 | 0.79697  |
| 1 | 0 | -7.88167 | -2.73227 | -0.39419 |
| 6 | 0 | -4.79097 | -0.68265 | 0.92051  |
| 6 | 0 | -3.20819 | -2.32749 | -0.31034 |
| 6 | 0 | -6.11333 | -0.30082 | 1.27028  |
| 1 | 0 | -8.22776 | -0.71761 | 1.0731   |
| 8 | 0 | -3.75452 | 0.08921  | 1.38657  |
| 1 | 0 | -3.22705 | -3.40144 | -0.54307 |
| 8 | 0 | -2.27748 | -2.07749 | 0.80709  |

|    |   |          |          |          |
|----|---|----------|----------|----------|
| 1  | 0 | -6.23866 | 0.57575  | 1.90629  |
| 1  | 0 | -1.70067 | -2.82087 | 1.05974  |
| 26 | 0 | -1.94846 | 0.01716  | 0.92194  |
| 6  | 0 | 2.64711  | 1.69294  | -0.45818 |
| 6  | 0 | 3.02819  | 2.06982  | 0.866    |
| 6  | 0 | 3.46803  | 2.03297  | -1.56065 |
| 6  | 0 | 4.24002  | 2.77449  | 1.04683  |
| 6  | 0 | 4.6714   | 2.74087  | -1.35543 |
| 1  | 0 | 3.15159  | 1.72263  | -2.55743 |
| 6  | 0 | 5.06485  | 3.11224  | -0.04973 |
| 1  | 0 | 4.53434  | 3.06369  | 2.05861  |
| 1  | 0 | 5.29835  | 2.99606  | -2.21031 |
| 1  | 0 | 5.99463  | 3.65653  | 0.11319  |
| 8  | 0 | 1.48664  | 0.9741   | -0.66446 |
| 1  | 0 | 0.30208  | 2.11039  | 1.22263  |
| 6  | 0 | 2.15034  | 1.7614   | 2.07373  |
| 1  | 0 | 2.61665  | 2.22082  | 2.95655  |
| 8  | 0 | 0.85188  | 2.39733  | 1.99668  |

## TS5

Fe,0,1.490070582,0.2876822938,0.4730529264  
O,0,2.2055224528,2.0446186838,0.5302851349  
O,0,0.0973393429,-0.2212522882,-1.1828121952  
O,0,0.0294094849,-1.5402899961,-3.0660697703  
O,0,-2.3658861858,-1.8677981334,-0.8584401616  
O,0,-0.0062169633,0.4533405547,1.6686074893  
O,0,-0.4246346638,2.272024052,3.0067483469  
N,0,2.6470279873,-0.0297771084,-1.201593332  
N,0,-2.5960097207,0.1232212115,1.0279712821  
C,0,3.4166897051,2.4942469847,0.1249565546  
C,0,3.9230897795,3.6995854561,0.6892144577  
H,0,3.3160222478,4.204771322,1.4400194633  
C,0,5.1680686834,4.2092046529,0.2883553035  
C,0,5.9475450212,3.5433020354,-0.6971260939  
H,0,6.9107174659,3.9473017938,-1.0040087309  
C,0,5.4565846165,2.3649182825,-1.2733597383  
H,0,6.0328519473,1.8433641411,-2.0405564981  
C,0,4.2009711071,1.8146567272,-0.8776627986  
C,0,3.7365301451,0.6091534083,-1.5487607062  
C,0,2.1715689303,-1.2315039899,-1.8913956606  
H,0,2.6804209332,-1.4066563306,-2.8512849351  
C,0,0.6589737048,-1.0174247767,-2.1224219966  
C,0,-3.7581266936,-2.0416784824,1.1304752444

C,0,-3.379919398,-0.7383692804,1.6430315677  
C,0,-2.2570019399,1.4063621964,1.6672403514  
H,0,-2.931347068,1.6574596327,2.5002989531  
C,0,-0.787067953,1.3931340552,2.1819997971  
H,0,5.5389091782,5.1303612905,0.7384411802  
H,0,4.3386542964,0.2414185985,-2.3936453858  
H,0,-3.7888670936,-0.4651541783,2.6268399705  
C,0,-4.656994327,-2.8367408874,1.9049691119  
H,0,-5.0363548256,-2.4292518813,2.8442791819  
C,0,-5.0472248156,-4.1109673283,1.4769105657  
H,0,-5.7348845867,-4.7067066347,2.0743579897  
C,0,-3.2371685786,-2.5691186617,-0.1050322062  
C,0,-3.6381481336,-3.8675551746,-0.5256855612  
C,0,-4.5309348632,-4.6205275951,0.2529251742  
H,0,-4.8297872127,-5.612430373,-0.0865232993  
H,0,-3.2338386275,-4.251837677,-1.4614754694  
H,0,-4.242450179,4.3094859844,1.1579017371  
C,0,-4.5695122622,3.6627871605,0.3398156448  
C,0,-5.8360494393,3.8594233275,-0.246093332  
C,0,-3.6962544693,2.6440242586,-0.1105162817  
C,0,-6.2348044632,3.0324996078,-1.3229545057  
H,0,-6.4929907688,4.6471536291,0.1206123281  
C,0,-4.1122783299,1.7983534396,-1.1925555589  
C,0,-2.3427189005,2.5049534537,0.5713639846  
C,0,-5.3808320889,2.0177981189,-1.7938264222  
H,0,-7.2067195267,3.1790773052,-1.7948895435  
O,0,-3.3382126224,0.7725875581,-1.6804217105  
H,0,-2.0321999661,3.4633150545,1.0156260761  
O,0,-1.3122846044,2.0500199935,-0.3783509169  
H,0,-5.6703806117,1.3699023264,-2.6216102562  
H,0,-1.1449546714,2.6831651374,-1.1035379103  
Fe,0,-1.8627868057,-0.055835633,-0.8745010053  
C,0,3.7296387264,-1.5972086364,1.0260690699  
C,0,3.6170089571,-2.4508984037,-0.1225877708  
C,0,4.9341479129,-1.6069789956,1.7791515348  
C,0,4.713746004,-3.2674273603,-0.4839421409  
C,0,6.0141273687,-2.4274776451,1.397754325  
H,0,4.9961603829,-0.9542195727,2.6506375471  
C,0,5.9123801424,-3.2613913883,0.2598637491  
H,0,4.6176114029,-3.9165514803,-1.3577353555  
H,0,6.9312922919,-2.4160270268,1.9874836726  
H,0,6.7453727117,-3.8976094961,-0.0370519271  
O,0,2.7132910775,-0.7716060592,1.4315693779  
H,0,1.2597711275,-3.1646359052,0.6042682091

C,0,2.351790162,-2.4937466056,-0.9655098224  
H,0,2.3723359325,-3.3779738539,-1.6251113115  
O,0,1.1486695478,-2.5339288886,-0.1349939919

## Int7

Fe,0,-1.7174853587,-0.1003446576,1.199246471  
O,0,-2.3507426763,-1.8864781862,1.320254641  
O,0,0.0240406658,0.1148454465,-2.2618944569  
O,0,-0.7385428435,1.9510020635,-3.4023078464  
O,0,1.97131394,1.8696004885,-1.1942617424  
O,0,-0.1565410286,-0.3094299955,2.3023790879  
O,0,0.590009323,-2.225859527,3.316859233  
N,0,-2.3267463574,-0.0617415825,-0.7805029972  
N,0,2.1639518252,0.0145281266,0.8715421752  
C,0,-2.9208352717,-2.743534031,0.4525351845  
C,0,-3.2495070792,-4.0602637627,0.8843712085  
H,0,-3.0179695757,-4.333865485,1.9133163566  
C,0,-3.8522346861,-4.968232738,0.0002621897  
C,0,-4.1515882203,-4.5986094432,-1.3413445021  
H,0,-4.6214007318,-5.3110970121,-2.0168217798  
C,0,-3.8318188185,-3.3093314859,-1.7799413385  
H,0,-4.0502724269,-3.0048480687,-2.8056226967  
C,0,-3.2131499532,-2.3628675404,-0.9055649083  
C,0,-2.9031909168,-1.0516899462,-1.437147349  
C,0,-2.067103765,1.1944565077,-1.5241342514  
H,0,-2.935594092,1.4885248407,-2.1349718101  
C,0,-0.8432272312,1.0943636024,-2.4862382507  
C,0,2.8546857118,2.3783322649,1.0172822327  
C,0,2.670029245,1.0371051414,1.5341824265  
C,0,1.9979661526,-1.2667510215,1.5947388465  
H,0,2.8607529002,-1.483420161,2.24534155  
C,0,0.7189882382,-1.2869116798,2.4882635438  
H,0,-4.0950283931,-5.9720141719,0.349685683  
H,0,-3.1880990929,-0.8853209404,-2.4875418572  
H,0,2.984520556,0.88026164,2.5772026396  
C,0,3.4131183223,3.3602799024,1.8932540602  
H,0,3.6869726013,3.0583799295,2.9062301234  
C,0,3.6072057266,4.6799056462,1.472030133  
H,0,4.0326517993,5.4185813086,2.1487588069  
C,0,2.4903434021,2.7567367074,-0.3246339414  
C,0,2.6876082742,4.1054951387,-0.7372581088  
C,0,3.2366939144,5.0465550073,0.1475893108  
H,0,3.3813548434,6.0737065105,-0.1879487778

H,0,2.4009574327,4.3757682554,-1.7532252265  
H,0,3.4587256701,-4.4785218138,1.0993133387  
C,0,3.852673823,-3.9107717846,0.2525879824  
C,0,5.0505244455,-4.3186096533,-0.3683178354  
C,0,3.1349422952,-2.7764501938,-0.1977949674  
C,0,5.5385344014,-3.5867070954,-1.4767066292  
H,0,5.5867892958,-5.1933154807,-0.0025686838  
C,0,3.638917506,-2.0368863519,-1.3160650735  
C,0,1.8597616165,-2.4038181335,0.5465105407  
C,0,4.8376879926,-2.4614044712,-1.9486702695  
H,0,6.4590570538,-3.8940112042,-1.9735736881  
O,0,3.0026122331,-0.9286905296,-1.8150754574  
H,0,1.4526434312,-3.2913262768,1.0538310956  
O,0,0.832908618,-1.8553718859,-0.3616851576  
H,0,5.1948391803,-1.8858680718,-2.803055502  
H,0,0.41056472,-2.5165814108,-0.9430832324  
Fe,0,1.5581761078,0.0179379836,-1.1078325929  
C,0,-3.5676678743,2.1704933664,1.3940896979  
C,0,-3.0071286031,2.8373739071,0.2573760475  
C,0,-4.7083936029,2.7253168213,2.0336422093  
C,0,-3.616452891,4.0267698983,-0.2095391413  
C,0,-5.3006596671,3.9056505972,1.5473318678  
H,0,-5.1087601355,2.2035607389,2.9033209459  
C,0,-4.7595306627,4.5628619439,0.4169270749  
H,0,-3.180351185,4.5354884303,-1.0728782485  
H,0,-6.1781870899,4.3131680857,2.0499209041  
H,0,-5.2125066491,5.4786915804,0.0394398762  
O,0,-3.0423823987,1.0095009427,1.9022178257  
H,0,-0.36501749,2.3161060549,1.0153826289  
C,0,-1.7864344383,2.323080956,-0.4942149612  
H,0,-1.2938473419,3.1571406948,-1.0184394698  
O,0,-0.8140387161,1.6883432643,0.4155278117

## TS6

|    |   |          |          |          |
|----|---|----------|----------|----------|
| 26 | 0 | 1.67641  | -0.42936 | -1.01969 |
| 8  | 0 | 2.1707   | -2.23549 | -1.27769 |
| 8  | 0 | -0.28181 | -0.19808 | 2.32236  |
| 8  | 0 | 0.84853  | 0.95098  | 3.94477  |
| 8  | 0 | -1.70696 | 2.05997  | 1.24138  |
| 8  | 0 | 0.23327  | -0.29987 | -2.28031 |
| 8  | 0 | -0.78837 | -1.98548 | -3.44811 |
| 7  | 0 | 2.20395  | -0.60648 | 0.98005  |
| 7  | 0 | -2.09795 | 0.4391   | -1.01052 |

|   |   |          |          |          |
|---|---|----------|----------|----------|
| 6 | 0 | 2.7186   | -3.18317 | -0.49112 |
| 6 | 0 | 3.03413  | -4.45358 | -1.04948 |
| 1 | 0 | 2.81419  | -4.61833 | -2.10378 |
| 6 | 0 | 3.61303  | -5.45432 | -0.2537  |
| 6 | 0 | 3.89451  | -5.22629 | 1.12262  |
| 1 | 0 | 4.34448  | -6.01004 | 1.72921  |
| 6 | 0 | 3.58606  | -3.9831  | 1.68496  |
| 1 | 0 | 3.79464  | -3.78681 | 2.73863  |
| 6 | 0 | 2.99866  | -2.94237 | 0.9008   |
| 6 | 0 | 2.7227   | -1.67825 | 1.55222  |
| 6 | 0 | 1.9947   | 0.59286  | 1.83314  |
| 1 | 0 | 2.87773  | 0.79986  | 2.45724  |
| 6 | 0 | 0.77956  | 0.44257  | 2.79558  |
| 6 | 0 | -2.38185 | 2.89084  | -0.95075 |
| 6 | 0 | -2.4156  | 1.5842   | -1.5837  |
| 6 | 0 | -2.1379  | -0.79668 | -1.82525 |
| 1 | 0 | -2.95402 | -0.77418 | -2.56525 |
| 6 | 0 | -0.80564 | -1.0608  | -2.59459 |
| 1 | 0 | 3.84973  | -6.42054 | -0.69964 |
| 1 | 0 | 2.98891  | -1.62542 | 2.61929  |
| 1 | 0 | -2.72799 | 1.57441  | -2.63873 |
| 6 | 0 | -2.71048 | 4.02607  | -1.75537 |
| 1 | 0 | -2.98722 | 3.86073  | -2.79852 |
| 6 | 0 | -2.67597 | 5.32225  | -1.2303  |
| 1 | 0 | -2.92651 | 6.17765  | -1.85485 |
| 6 | 0 | -2.01778 | 3.09023  | 0.43105  |
| 6 | 0 | -1.98492 | 4.41578  | 0.94988  |
| 6 | 0 | -2.3061  | 5.50913  | 0.13094  |
| 1 | 0 | -2.27294 | 6.51601  | 0.54744  |
| 1 | 0 | -1.70411 | 4.54747  | 1.99449  |
| 1 | 0 | -4.37235 | -3.54984 | -1.69518 |
| 6 | 0 | -4.67564 | -2.96717 | -0.82168 |
| 6 | 0 | -5.98014 | -3.1037  | -0.30615 |
| 6 | 0 | -3.73508 | -2.09055 | -0.22938 |
| 6 | 0 | -6.3516  | -2.36007 | 0.8393   |
| 1 | 0 | -6.68819 | -3.78282 | -0.77938 |
| 6 | 0 | -4.12096 | -1.33197 | 0.92249  |
| 6 | 0 | -2.35654 | -1.99694 | -0.8659  |
| 6 | 0 | -5.43117 | -1.48802 | 1.44984  |
| 1 | 0 | -7.35344 | -2.46257 | 1.2572   |
| 8 | 0 | -3.26893 | -0.45992 | 1.54869  |
| 1 | 0 | -2.13609 | -2.92139 | -1.42    |
| 8 | 0 | -1.29759 | -1.77435 | 0.1408   |
| 1 | 0 | -5.69736 | -0.90732 | 2.33348  |

|    |   |          |          |          |
|----|---|----------|----------|----------|
| 1  | 0 | -1.10972 | -2.54903 | 0.70518  |
| 26 | 0 | -1.60244 | 0.18101  | 0.98512  |
| 6  | 0 | 3.588    | 1.79782  | -0.93174 |
| 6  | 0 | 2.99145  | 2.38113  | 0.23306  |
| 6  | 0 | 4.75438  | 2.38901  | -1.48616 |
| 6  | 0 | 3.58756  | 3.53033  | 0.80698  |
| 6  | 0 | 5.33371  | 3.52572  | -0.89272 |
| 1  | 0 | 5.18277  | 1.93177  | -2.37834 |
| 6  | 0 | 4.7541   | 4.10287  | 0.26177  |
| 1  | 0 | 3.12341  | 3.97791  | 1.68921  |
| 1  | 0 | 6.23098  | 3.96275  | -1.3314  |
| 1  | 0 | 5.1965   | 4.98577  | 0.72126  |
| 8  | 0 | 3.06762  | 0.69039  | -1.55259 |
| 1  | 0 | 0.45653  | 1.9779   | -0.69893 |
| 6  | 0 | 1.7489   | 1.81685  | 0.90811  |
| 1  | 0 | 1.25138  | 2.60859  | 1.492    |
| 8  | 0 | 0.78318  | 1.29086  | -0.08144 |

## Int8

Fe,0,1.8413284339,-0.6354395937,-1.0081611726  
O,0,2.3781662097,-2.4122520008,-1.3226968228  
O,0,-0.3620028469,0.112407872,2.4498352157  
O,0,1.1555757384,-0.7490539562,3.9205860369  
O,0,-1.4660002924,2.4346408172,0.8758206575  
O,0,0.3932441992,-0.4174881941,-2.2613040707  
O,0,-0.7002197338,-2.1287696782,-3.3221406997  
N,0,2.3449551041,-0.8678838951,0.9932449148  
N,0,-1.9763860181,0.5578594745,-1.1507817495  
C,0,3.0272308414,-3.3393835522,-0.5864462345  
C,0,3.4067967079,-4.5673501718,-1.1950794312  
H,0,3.1571540598,-4.7182055258,-2.2447197688  
C,0,4.0831647483,-5.547360541,-0.4513991904  
C,0,4.4036368801,-5.3374952844,0.9187670355  
H,0,4.9294518709,-6.1045950709,1.4842564186  
C,0,4.0341160049,-4.1342704665,1.5297383026  
H,0,4.2686411421,-3.9530471447,2.5805231236  
C,0,3.3430991581,-3.1175382079,0.8004504681  
C,0,2.9835072968,-1.9055923087,1.5089134283  
C,0,2.0383750041,0.2760444457,1.9037936891  
H,0,2.904513485,0.5013430454,2.5446895755  
C,0,0.8715681401,-0.1528189971,2.8470489713  
C,0,-2.6919372881,2.9218156984,-1.1777300729  
C,0,-2.5705862452,1.5822726164,-1.7302717211



C,0,-2.0116842272,-0.7583500653,-1.8239208935  
H,0,-2.8198504982,-0.8161987634,-2.571509446  
C,0,-0.6834126616,-1.1415270876,-2.5412851297  
H,0,4.366131616,-6.4828423732,-0.9342158532  
H,0,3.2714278869,-1.864786425,2.5696424245  
H,0,-3.0332686067,1.4323710217,-2.7175121385  
C,0,-3.3866604576,3.8950350981,-1.9594995599  
H,0,-3.7973476946,3.590407745,-2.9244132372  
C,0,-3.5456380631,5.2107542007,-1.508418645  
H,0,-4.0795745895,5.9410652199,-2.1137012666  
C,0,-2.1427339385,3.3074074739,0.097405604  
C,0,-2.3085163329,4.649016736,0.5413526404  
C,0,-2.9986449181,5.5816266966,-0.2492909074  
H,0,-3.1153448308,6.6041312807,0.1105120713  
H,0,-1.8832075957,4.9230817821,1.5063818181  
H,0,-4.3284023014,-3.4496272977,-1.3180222962  
C,0,-4.6239878762,-2.7212918301,-0.558715977  
C,0,-5.9381165374,-2.732054802,-0.0486578838  
C,0,-3.663822143,-1.7845565141,-0.1065863223  
C,0,-6.3002915808,-1.7935037378,0.9469338611  
H,0,-6.6608180466,-3.461222555,-0.4128413498  
C,0,-4.0382701748,-0.8313060191,0.8959197455  
C,0,-2.2766393141,-1.8288431475,-0.7283936603  
C,0,-5.3609046184,-0.8575368203,1.4170085141  
H,0,-7.3103704621,-1.7948809504,1.3576554969  
O,0,-3.1675522705,0.1013726841,1.3881250572  
H,0,-2.0861858849,-2.8224224889,-1.1608613719  
O,0,-1.2208728837,-1.5261058532,0.2637231899  
H,0,-5.6198757948,-0.1289071889,2.1857539932  
H,0,-1.078337683,-2.2378682688,0.9175143073  
Fe,0,-1.4106596328,0.5314303475,0.8724739359  
C,0,3.5769039784,1.7310840665,-0.739397075  
C,0,2.9051688237,2.2184448241,0.4274045842  
C,0,4.7060583488,2.4314435388,-1.238710141  
C,0,3.3878650148,3.3920322232,1.0559993252  
C,0,5.175119571,3.5882844467,-0.5889827343  
H,0,5.1927677377,2.0430774138,-2.1334095074  
C,0,4.5182088869,4.0755890147,0.5654507313  
H,0,2.8657054303,3.767992373,1.9387537043  
H,0,6.046039415,4.1109083647,-0.9847812939  
H,0,4.8740726009,4.9743460059,1.0671641212  
O,0,3.1538094432,0.615173425,-1.4154115055  
H,0,0.5348245066,1.6924920265,-0.6400829645  
C,0,1.7071454341,1.5229006897,1.0553225952

H,0,1.1417662283,2.2382194526,1.6711297851  
O,0,0.7793610959,0.9994766565,0.0132067505

## TS7

Fe,0,1.7524469169,0.1558114627,-1.0441369165  
O,0,2.8965628816,-1.2884182142,-1.4593561929  
O,0,-0.3686917198,-0.0198076843,2.5114173743  
O,0,1.364181836,-0.0820802559,3.9959376081  
O,0,-2.4218476607,1.6226799367,1.0754742777  
O,0,0.3491233018,-0.1026118434,-2.323155036  
O,0,-0.1973334379,-1.8889354777,-3.6440138022  
N,0,2.3591542132,0.0604377143,0.9305501099  
N,0,-2.1496262745,-0.2074064836,-1.0431390644  
C,0,3.784936566,-2.0081907287,-0.7414819319  
C,0,4.5294522228,-3.0328414452,-1.3886273907  
H,0,4.3489147954,-3.2057047591,-2.4489643205  
C,0,5.4660507349,-3.7912662545,-0.6689561622  
C,0,5.6943552589,-3.5543805831,0.7153400384  
H,0,6.4245015112,-4.1480887437,1.2621060559  
C,0,4.9697114487,-2.5488546362,1.3639254929  
H,0,5.1298093951,-2.3492991573,2.4252942175  
C,0,4.0057333404,-1.7614193815,0.6604520414  
C,0,3.2992133771,-0.7405395039,1.4071041534  
C,0,1.7512400911,1.0462607074,1.8766456479  
H,0,2.5356661944,1.5583897975,2.4538157387  
C,0,0.8651585592,0.2665453995,2.8925093525  
C,0,-3.6829965125,1.7292750186,-1.0119083561  
C,0,-3.0798785406,0.5441516273,-1.5988464322  
C,0,-1.6724266604,-1.3977564513,-1.7846667298  
H,0,-2.4548979745,-1.8116387908,-2.4405537857  
C,0,-0.4256962119,-1.1213489686,-2.6739796147  
H,0,6.0263760022,-4.5732960458,-1.1815623206  
H,0,3.5839479757,-0.6365199781,2.4647010842  
H,0,-3.4530149863,0.2679519029,-2.5967388301  
C,0,-4.660597077,2.4221532457,-1.7898569278  
H,0,-4.9137017631,2.0291645527,-2.7767194123  
C,0,-5.2849140048,3.5792050222,-1.3096164185  
H,0,-6.0274820347,4.0969824051,-1.9139418436  
C,0,-3.3381087202,2.2334572075,0.2931889352  
C,0,-3.9794385862,3.4112978527,0.7678226136  
C,0,-4.9344442761,4.0709684688,-0.0221223378  
H,0,-5.4130536664,4.972604965,0.3605937458  
H,0,-3.7036942451,3.7795525681,1.755480909

H,0,-2.2810693061,-4.9144395424,-1.2802078424  
C,0,-2.8424202144,-4.4364020355,-0.4736531564  
C,0,-3.9372767618,-5.1051032482,0.1106148767  
C,0,-2.44569746,-3.1496669818,-0.0365718608  
C,0,-4.6456494948,-4.4808059406,1.164730296  
H,0,-4.227235974,-6.0939947744,-0.2421833472  
C,0,-3.1698130069,-2.5201309919,1.0268851406  
C,0,-1.2779919466,-2.4856844975,-0.7477382013  
C,0,-4.2637530148,-3.2058168096,1.6215471032  
H,0,-5.4896601177,-4.9882084031,1.6328034258  
O,0,-2.8372145208,-1.2843877465,1.5056485526  
H,0,-0.6708936996,-3.2491287911,-1.2581466727  
O,0,-0.4063994667,-1.7398802872,0.1938199196  
H,0,-4.7936056947,-2.7105164244,2.4356870108  
H,0,0.0743993505,-2.3275030427,0.8112897892  
Fe,0,-1.5321722711,-0.0490247798,0.9591235453  
C,0,2.5583585495,2.9820854772,-0.7664754152  
C,0,1.7926042499,3.191004413,0.4245739408  
C,0,3.3434655267,4.0433613359,-1.2877376722  
C,0,1.8370095522,4.4578601277,1.0555671043  
C,0,3.3826292177,5.2897699092,-0.6354527065  
H,0,3.9103250276,3.8590330698,-2.2003245571  
C,0,2.6289030246,5.5045325209,0.542501355  
H,0,1.2425710692,4.6173544994,1.957921752  
H,0,3.9943428265,6.0924599581,-1.0474745695  
H,0,2.6516913209,6.4700115009,1.0458623315  
O,0,2.5439410825,1.789881629,-1.4420316831  
H,0,-0.2792962469,1.8754303646,-0.568309738  
C,0,0.9543041986,2.1028420447,1.0759235752  
H,0,0.2012250446,2.5596236668,1.7356655402  
O,0,0.2202865277,1.3003112538,0.0534627872

## Com2

|    |   |          |          |          |
|----|---|----------|----------|----------|
| 26 | 0 | -1.51195 | -0.26173 | -0.99115 |
| 8  | 0 | -2.82367 | 1.04981  | -1.31767 |
| 8  | 0 | 0.35691  | 0.03256  | 2.52502  |
| 8  | 0 | -1.20572 | -0.49362 | 4.10422  |
| 8  | 0 | 2.8218   | -1.04695 | 1.32015  |
| 8  | 0 | -0.35601 | -0.03836 | -2.52426 |
| 8  | 0 | 1.20612  | 0.48686  | -4.10415 |
| 7  | 0 | -2.22085 | -0.44968 | 0.97007  |
| 7  | 0 | 2.22003  | 0.44817  | -0.96998 |
| 6  | 0 | -3.91172 | 1.47052  | -0.63595 |

|   |   |          |          |          |
|---|---|----------|----------|----------|
| 6 | 0 | -4.79687 | 2.39839  | -1.25001 |
| 1 | 0 | -4.56196 | 2.73941  | -2.25769 |
| 6 | 0 | -5.93572 | 2.85343  | -0.5665  |
| 6 | 0 | -6.23165 | 2.3975   | 0.7476   |
| 1 | 0 | -7.11811 | 2.75505  | 1.2681   |
| 6 | 0 | -5.36833 | 1.48342  | 1.36308  |
| 1 | 0 | -5.57657 | 1.12215  | 2.37211  |
| 6 | 0 | -4.19916 | 1.00502  | 0.69629  |
| 6 | 0 | -3.35383 | 0.06718  | 1.41288  |
| 6 | 0 | -1.50782 | -1.4048  | 1.8662   |
| 1 | 0 | -2.22318 | -2.04684 | 2.40228  |
| 6 | 0 | -0.74135 | -0.57992 | 2.93735  |
| 6 | 0 | 4.19848  | -1.0056  | -0.69292 |
| 6 | 0 | 3.35301  | -0.06974 | -1.41168 |
| 6 | 0 | 1.50758  | 1.40208  | -1.8678  |
| 1 | 0 | 2.22341  | 2.04271  | -2.40493 |
| 6 | 0 | 0.74127  | 0.57525  | -2.93764 |
| 1 | 0 | -6.60205 | 3.56547  | -1.05355 |
| 1 | 0 | -3.70867 | -0.22795 | 2.4123   |
| 1 | 0 | 3.70785  | 0.22335  | -2.4117  |
| 6 | 0 | 5.36853  | -1.48432 | -1.35793 |
| 1 | 0 | 5.57689  | -1.12544 | -2.3678  |
| 6 | 0 | 6.23269  | -2.39559 | -0.73955 |
| 1 | 0 | 7.11986  | -2.75346 | -1.25863 |
| 6 | 0 | 3.91089  | -1.46782 | 0.64042  |
| 6 | 0 | 4.79709  | -2.39275 | 1.25751  |
| 6 | 0 | 5.93683  | -2.84815 | 0.57576  |
| 1 | 0 | 6.60398  | -3.55781 | 1.06515  |
| 1 | 0 | 4.56214  | -2.73122 | 2.26604  |
| 1 | 0 | 0.54185  | 4.92839  | -1.66095 |
| 6 | 0 | 1.16965  | 4.75024  | -0.78499 |
| 6 | 0 | 1.84458  | 5.82564  | -0.17363 |
| 6 | 0 | 1.28727  | 3.43056  | -0.28616 |
| 6 | 0 | 2.64524  | 5.58049  | 0.96734  |
| 1 | 0 | 1.74366  | 6.8335   | -0.57382 |
| 6 | 0 | 2.09652  | 3.18796  | 0.87154  |
| 6 | 0 | 0.57845  | 2.31492  | -1.03251 |
| 6 | 0 | 2.76617  | 4.2787   | 1.4883   |
| 1 | 0 | 3.16876  | 6.40374  | 1.454    |
| 8 | 0 | 2.22777  | 1.94384  | 1.41881  |
| 1 | 0 | -0.19603 | 2.73581  | -1.69186 |
| 8 | 0 | -0.11592 | 1.39589  | -0.07185 |
| 1 | 0 | 3.37117  | 4.07268  | 2.37146  |
| 1 | 0 | -0.66417 | 1.91446  | 0.55801  |

|    |   |          |          |          |
|----|---|----------|----------|----------|
| 26 | 0 | 1.50892  | 0.26289  | 0.99039  |
| 6  | 0 | -2.09737 | -3.18725 | -0.87402 |
| 6  | 0 | -1.28541 | -3.43062 | 0.28165  |
| 6  | 0 | -2.76601 | -4.27801 | -1.49185 |
| 6  | 0 | -1.16427 | -4.75115 | 0.77737  |
| 6  | 0 | -2.64138 | -5.58071 | -0.97402 |
| 1  | 0 | -3.37309 | -4.07123 | -2.3734  |
| 6  | 0 | -1.83807 | -5.82664 | 0.16492  |
| 1  | 0 | -0.53461 | -4.92996 | 1.65188  |
| 1  | 0 | -3.16412 | -6.404   | -1.46146 |
| 1  | 0 | -1.73435 | -6.83513 | 0.56279  |
| 8  | 0 | -2.23235 | -1.9422  | -1.41825 |
| 1  | 0 | 0.66523  | -1.9099  | -0.55973 |
| 6  | 0 | -0.57772 | -2.31518 | 1.02938  |
| 1  | 0 | 0.19715  | -2.73629 | 1.6881   |
| 8  | 0 | 0.1153   | -1.39353 | 0.07048  |
